# Supplementary material for: Risk factors for ischaemic heart disease mortality among men with different occupational physical demands. A 30-year prospective cohort study
Source: PubMed Central journal article supplement — BMJ Open. 2012 Jan 4;2(1):e000279. doi: 10.1136/bmjopen-2011-000279 (PMC3253417; doi:10.1136/bmjopen-2011-000279), 2012-01-04
Supplement: bmjopen-2011-000279-s1.pdf [file bmjopen-2011-000279-s1.pdf]

STROBE Statement—Checklist of items that should be included in reports of *cohort studies*

|                           | <b>Item No</b> | <b>Recommendation</b>                          |
|---------------------------|----------------|------------------------------------------------|
| <b>Title and abstract</b> | 1              | Page 1<br>Page 2                               |
| <b>Introduction</b>       |                |                                                |
| Background/rationale      | 2              | Page 3                                         |
| Objectives                | 3              | Page 3                                         |
| <b>Methods</b>            |                |                                                |
| Study design              | 4              | Page 4 and 7                                   |
| Setting                   | 5              | Page 4                                         |
| Participants              | 6              | Page 4                                         |
| Variables                 | 7              | Page 4, 5 and 6                                |
| Data sources/ measurement | 8              | Page 4, 5 and 6                                |
| Bias                      | 9              | Page 7                                         |
| Study size                | 10             | Page 4 and 7                                   |
| Quantitative variables    | 11             | Page 4, 5 and 6                                |
| Statistical methods       | 12             | Page 7<br>Page 7<br>Page 7<br>Page 7<br>Page 7 |
| <b>Results</b>            |                |                                                |
| Participants              | 13             | Page 8<br>Page 8                               |
| Descriptive data          | 14             | Page 8<br>Page 8<br>Page 8                     |
| Outcome data              | 15             | Page 8 and table 1-5                           |
| Main results              | 16             | Table 1-5<br>Page 8 and 9<br>Table 1-5         |
| Other analyses            | 17             | No other analyses were done                    |
| <b>Discussion</b>         |                |                                                |
| Key results               | 18             | Page 9                                         |
| Limitations               | 19             | Page 11                                        |
| Interpretation            | 20             | Page 10 and 11                                 |
| Generalisability          | 21             | Page 10 and 11                                 |
| <b>Other information</b>  |                |                                                |
| Funding                   | 22             | Page 19                                        |
