# Supplementary material for: Risk factors for ischaemic heart disease mortality among men with different occupational physical demands. A 30-year prospective cohort study
Source: PubMed Central journal article supplement — BMJ Open. 2012 Jan 4;2(1):e000279. doi: 10.1136/bmjopen-2011-000279 (PMC3253417; doi:10.1136/bmjopen-2011-000279), 2012-01-04
Supplement: bmjopen-2011-000279.draft_revisions.pdf [file bmjopen-2011-000279.draft_revisions.pdf]

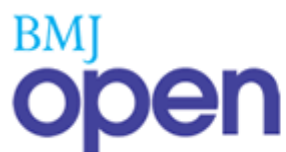

**Risk factors for ischaemic heart disease mortality among men with different occupational physical demands. A 30-year prospective cohort study**

|                                 |                                                                                                |
|---------------------------------|------------------------------------------------------------------------------------------------|
| Journal:                        | <i>BMJ Open</i>                                                                                |
| Manuscript ID:                  | bmjopen-2011-000279                                                                            |
| Article Type:                   | Research                                                                                       |
| Date Submitted by the Author:   | 29-Jul-2011                                                                                    |
| Complete List of Authors:       | Holtermann, Andreas<br>Mortensen, Ole<br>Søgaard, Karen<br>Gyntelberg, Finn<br>Suadicani, Poul |
| <b>Primary Subject Heading</b>: | Occupational & environmental medicine                                                          |
| Keywords:                       | Ischaemic heart disease < CARDIOLOGY, EPIDEMIOLOGY, OCCUPATIONAL & INDUSTRIAL MEDICINE         |
|                                 |                                                                                                |

SCHOLARONE™  
Manuscripts

1  
2  
3  
4  
5  
6 **Risk factors for ischaemic heart disease mortality among men with different oc-**  
7 **cupational physical demands. A 30-year prospective cohort study**  
8  
9

10  
11  
12  
13  
14 Andreas Holtermann<sup>b</sup>, Ole Steen Mortensen<sup>a,b</sup>,  
15 Karen Sjøgaard<sup>c</sup>, Finn Gyntelberg<sup>a</sup>, Poul Suadicani<sup>a</sup>  
16  
17

18  
19  
20  
21 <sup>a</sup>The Copenhagen Male Study  
22 Epidemiological Research Unit  
23 Dept. of Occupational and  
24 Environmental Medicine  
25  
26 Bispebjerg University Hospital  
27  
28 DK-2400 Copenhagen NV Denmark  
29  
30  
31

32  
33 <sup>b</sup>National Research Centre for the Working Environment  
34 Lersø Park Allé 105  
35  
36 DK-2100 Copenhagen, Denmark  
37  
38  
39

40  
41 <sup>c</sup>Institute of Sport Science and Clinical Biomechanics  
42 University of Southern Denmark  
43  
44 Campusvej 55, DK-5230 Odense M, Denmark  
45  
46

47  
48 Correspondence to Andreas Holtermann  
49 National Research Centre for the Working Environment  
50 Lersø Parkallé 105, 2100 Copenhagen Ø, Denmark  
51  
52 E-mail: [aho@nrcwe.dk](mailto:aho@nrcwe.dk)  
53  
54 Telephone number: +45 39165200  
55  
56 Fax number: +45 39165201  
57  
58

59  
60  
Keywords: Cardiovascular health; occupational health; cardiorespiratory fitness; physical activity

Word count: 2597

## ABSTRACT

**Objectives** Men with high physical work demands have elevated cardiovascular strain. Theoretically, the impact of risk factors for ischaemic heart disease (IHD) may thus depend on physical work demands. We investigate if established hazards for IHD impose different risk for IHD mortality depending on level of occupational physical activity.

**Design** Prospective 30-year follow-up in the Copenhagen Male Study of 5,249 gainfully employed men aged 40-59 years; 311 men with cardiovascular disease/diabetes were excluded. Physical fitness was recorded using the Åstrand cycling test, and information on physical work demands obtained from the questionnaire.

**Results** 579 men (11.8%) died due to IHD and 2,628 (53.7%) from all-cause mortality. Similarities and differences in risk predictors between men with low (n=1,219), medium (n=2,636), and high (n=846) physical work demands were found. After control for potential confounders, high physical fitness conferred a reduced risk of IHD mortality among men with high physical work demands only (HR:0.48,CI95%:0.24-0.96), a moderate or high level of leisure time physical activity was associated with a reduced risk of IHD mortality among men with moderate and high physical work demands only. High systolic blood pressure and smoking were risk factors in all groups. Similar, but less pronounced differences in risk factors for all-cause mortality between groups were found.

**Conclusion** Risk factors for IHD and all-cause mortality are not identical for men with different physical work demands. Preventive initiatives for IHD ought to be tailored to the physical work demands.

## ARTICLE SUMMARY

### Article focus

- Men with high physical work demands have elevated cardiovascular strain and risk for ischaemic heart disease (IHD)
- Unknown if established hazards for IHD impose different risk for IHD mortality depending on level of occupational physical activity

### Key messages

- Risk factors for IHD and all-cause mortality are not identical for men with different physical work demands
- Low physical fitness and leisure time physical activity particularly increase the risk for IHD mortality among men with high physical work demands
- Preventive initiatives for IHD ought not to be general, but tailored to the physical work demands of employees

### Strengths and limitations

Study strengths are the 30-years follow-up on objective outcomes, inclusion of several objectively measured risk factors for IHD and mortality, and exclusion of workers with pre-existing cardiovascular disease at baseline. Study limitations are that physical work demands was based on self-assessment, and lacking repeated measures of exposure during the relatively long follow-up period

## INTRODUCTION

Cardiovascular diseases are among the leading cause of death worldwide and account for about 30% of all deaths.[1] Occupational factors may be responsible for up to about 20% of all ischaemic heart disease (IHD) incidents.[2] Exposure to high physical work demands is an independent risk factor for IHD mortality and carotid arterial atherosclerosis.[3-5]

Physiologically, dynamic or static occupational physical activity several hours per day may induce a prolonged intravascular turbulence and increased wall shear stress,[6] inducing inflammatory processes in the arterial walls that may potentially lead to atherosclerosis.[5] These acute adverse effects of occupational physical activity may be modified by leisure time physical activity known to promote cardio-respiratory physical fitness [7] and reduce heart rate and blood pressure during daily activities.[8] A higher cardio-respiratory physical fitness and lower heart rate provides a longer period in the diastolic phase of the cardiac cycle, causing better myocardium perfusion and a favourable intravascular turbulence and wall shear stress, reducing risk for inflammation and atherosclerosis.[5, 6] Previous results from the Copenhagen Male Study support this rationale [4] showing that high physical work demands confer an increased risk of IHD mortality among men with a low physical fitness, but not among men with high physical fitness.

The theoretical implication is that those exposed to high physical demands and cardiovascular strain at work might be particularly vulnerable when exposed to other established risk factors for IHD mortality like smoking, high blood pressure and low leisure time physical activity. Therefore, these risk factors for IHD and all-cause mortality may impose a divergent impact on people with different physical activity levels at work. This hypothesis has not previously been addressed in the scientific medical literature although, if supported, it may have important public health implications and be relevant in an occupational health context.

## MATERIALS AND METHODS

### Study design and population

The Copenhagen Male Study was established in 1970–1971. At 14 companies in Copenhagen, covering the railway, public road construction, military, post, telephone, customs, national bank, and the medical industry, all men aged 40–59 years were invited; 5,249 men, 87% of potential participants, agreed to participate.[9, 10]

The examination consisted of a questionnaire, a short interview, and a clinical examination including measurements of height, weight and blood pressure, and measurement of cardiorespiratory (physical) fitness following a bicycle ergometer test. Indirect measurement of physical fitness (VO<sub>2</sub>Max) was performed with a bicycle ergometer. Thirty-five men with orthopaedic problems unable to perform the bicycle test were excluded from the study.

From the questionnaire, information about working conditions including perceived psychosocial pressure during work, lifestyle, and general health, including history of myocardial infarction, angina pectoris, and intermittent claudication was obtained. The information given in the questionnaire was clarified with each subject in the ensuing interview by one of the authors (FG). Details on the questionnaire have already been published [11] and are elaborated in more detail below.

### Weekly work hours

Participants reported their weekly number of work hours in categories: 1) < 30, 2) 30-35, 3) 36-40, 4) 41-45, and 5) > 45. The distributions of answers in these groups were: 0.2%, 0.6%, 12.1%, 68.6%, and 18.6%, respectively, among men eligible for study. Due to the small number of men working less than 36 hours/week, the first three groups were pooled.

### Markers of psychosocial pressure at work and leisure

“Are you under psychological pressure when performing your work?” Answer options were: “rarely” and “regularly”.

“Do you take sedatives or sleep medicine?” Answer options were: “rarely”, “regularly” and “never”.

“Are you under psychological pressure in your leisure time?” Answer options were: “rarely” and “regularly”.

### Physical fitness

Heart rate was measured during submaximal bicycle work in a steady state with the aid of a stopwatch and stethoscope. The loads used were 100, 150 and 200 W. One, two or in a few cases three different loads were used. The load chosen in each case was based on weight and age of the person or heart rate during the first minute of the test, and the estimation of  $VO_2\text{Max}$  was accomplished with the aid of Åstrand's nomogram.[12] The correlation between directly and indirectly measured  $VO_2\text{Max}$  is high. The method used has previously been described in detail.[9]

### Physical activity in leisure time

Which description most precisely covers your pattern of physical activity in leisure time?

1. You are mainly sedentary *e.g.* you read, watch television, go to the pictures. In general you spend most of your leisure time performing sedentary tasks.
2. You go for a walk, use your bicycle a little or perform activity for at least 4 hours/week. *e.g.* light gardening, leisure-time building activity, table tennis and bowling.
3. You are an active athlete, run, play tennis or badminton for at least 3 hours/week. If you frequently perform heavy gardening, you also belong to this group.

- 1  
2 4. You take part in competitive sports, swim, play European football, handball or run long dis-  
3  
4 tances regularly i.e. several times/week.  
5

6  
7 In the analyses group 1 is referred to as Low and group 2 as Moderate; since only 0.4% belonged to  
8  
9 group 4, groups 3 and 4 were pooled and are referred to as High.  
10

### 11 12 13 *Lifestyle factors*

#### 14 **Smoking**

15  
16  
17 The men reported if they smoked currently, previously or had never smoked.  
18

#### 19 **Alcohol**

20  
21  
22 Participants reported their daily average alcohol consumption as the number of alcoholic beverages  
23  
24 consumed per day in categories: 0, 1-2, 3-5, 6-10, and > 10.  
25  
26  
27

### 28 29 30 *Clinical and health related factors*

#### 31 **Body Mass Index (BMI)**

32  
33  
34 Based on height and weight measurements BMI was calculated as  $\text{kg/m}^2$ .  
35

#### 36 **Blood pressure**

37  
38  
39 Measurements of blood pressure were carried out with the subject seated and after at least 5 min  
40  
41 rest. A 12-cm wide, 26-cm-long cuff was firmly and evenly applied to the subject's right upper arm  
42  
43 with the lower edge of the cuff placed 2 cm antecubitally. Diastolic blood pressure was recorded at  
44  
45 the point where the Korotkoff sounds disappeared (phase 5).  
46  
47  
48

#### 49 **Hypertension treatment**

50  
51  
52 The participants were asked if they received treatment due to hypertension from their physician or  
53  
54 elsewhere. Answer options were yes and no.  
55

#### 56 **Diabetes treatment**

57  
58  
59  
60



1  
2 The participants were asked if they received treatment due to diabetes mellitus from their physician  
3 or elsewhere. Whether their diabetes was type 1 or 2 was not recorded, and neither was their actual  
4 medication. Answer options were yes and no.  
5  
6  
7

### 8 ***Social class***

9  
10 The men were divided into five social classes according to a system originally elaborated by Svalas-  
11 toga, later adjusted by Hansen.[13, 14] This classification system is based on education level, and  
12 job position in terms of number of subordinates. Typical jobs in the study cohort were, in social  
13 class I: officer, civil engineer, office executive, head of department; social class II: head clerk, engi-  
14 neer; social class III: engine driver, train guard; social class IV: machine fitter in a telephone com-  
15 pany; social class V: unskilled laborer, mechanic, driver.  
16  
17  
18  
19  
20  
21  
22  
23  
24  
25  
26  
27

### 28 **Eligibility**

29  
30 In addition to the 35 men unable to carry out the bicycle test, men with a history of myocardial in-  
31 farction (n=74), angina pectoris (n=165) or intermittent claudication (n=105) and 37 men receiving  
32 treatment due to diabetes were excluded from the prospective study. In total this latter group com-  
33 prised 311 men and 9 men with missing answers leaving 4,906 men for the incidence study. With  
34 respect to all variables included, missing values ranged from 0 to 2.7%.  
35  
36  
37  
38  
39  
40  
41  
42  
43  
44

### 45 **End-points**

46  
47 Information on death diagnoses within the period 1970-71 to end of 2001 was obtained from offi-  
48 cial national registers. The ischaemic heart disease mortality diagnoses used encompassed ICD-8  
49 codes : 410-14, and (from 1994) ICD-10: I20-I25.  
50  
51  
52  
53  
54  
55

### 56 **Statistical analyses**

57  
58 Basic statistical analyses, including Chi-squared analysis (likelihood ratio), unpaired (Student's) t  
59 test, and regression analyses, were performed. Relative risks were estimated by  $\exp(\beta)$ , where  $\beta$  is the  
60

1 hazard coefficient for the variable of interest in a Cox's proportional hazards regression model with the  
2 maximum likelihood ratio method. Assumptions regarding the use of Cox's proportional hazards were  
3 met by inspection of the log minus log function at the covariate mean. A two-sided probability value of  
4  $p \leq 0.05$  was a priori taken as significant.  
5  
6  
7  
8  
9  
10

## 11 12 13 **RESULTS**

14  
15  
16 In the eligible study population of male employees who had completed the ergometer test and were  
17 without a history of myocardial infarction, angina pectoris, intermittent claudication or diabetes,  
18 579 died (11.8%) from IHD during the period 1970/1971 to 2001. During the same period, 2,628  
19 (53.7%) died in total.  
20  
21  
22  
23  
24  
25  
26  
27

28 Table 1 shows the association between lifestyle and other potential predictors with risk of IHD mor-  
29 tality including the entire population eligible for study. Hazard ratios (95%CI) are presented for  
30 each factor following different adjustment criteria: control for age only, age plus lifestyle, age plus  
31 clinical factors, and, finally, a model including all available potential risk factors/confounders. In  
32 the final model controlling for all factors, significant risk factors of IHD mortality were age, smok-  
33 ing, low leisure time physical activity, high systolic and diastolic blood pressure, and low social  
34 class.  
35  
36  
37  
38  
39  
40  
41  
42  
43  
44  
45  
46

47 Table 2 presents the results of a similar analysis including only men with low physical work de-  
48 mands. In the final, fully adjusted model, significant associations with risk of IHD mortality were  
49 found for age, alcohol consumption - with a lower risk among those consuming 1-2 beverages, sys-  
50 tolic and diastolic blood pressure. Never smokers had half the risk of IHD mortality compared to  
51 current smokers, HR = 0.51(0.25-1.02).  
52  
53  
54  
55  
56  
57  
58  
59  
60

1  
2 Table 3 presents the association between lifestyle and other potential predictors and risk for IHD  
3 mortality among men with moderate physical work demands. In the final model, significant positive  
4 associations with risk of IHD mortality were found for age, smoking, low leisure time physical ac-  
5 tivity, high systolic blood pressure, and low social class. Surprisingly, perceived psychological  
6 pressure at work conferred a lower risk of IHD mortality.  
7  
8  
9  
10  
11  
12

13  
14  
15  
16 Table 4 shows the association between lifestyle and other potential predictors and risk for IHD mor-  
17 tality among men with high physical work demands. In the final model, significant positive associa-  
18 tions with risk of IHD mortality were found for age, smoking, low leisure time physical activity,  
19 high systolic blood pressure and low physical fitness.  
20  
21  
22  
23  
24

25  
26  
27  
28 Among the total eligible study population, significant multi-adjusted (i.e. age, lifestyle, clinical fac-  
29 tors, psychosocial stress at work and leisure, number of work hours, and social class) positive asso-  
30 ciations with risk of all-cause mortality were found for smoking, alcohol consumption, low leisure  
31 time physical activity, high systolic and diastolic blood pressure, low physical fitness, and low so-  
32 cial class (data on all-cause mortality not shown). An inverse multi-adjusted association was found  
33 for number of weekly work hours and all-cause mortality. Among males with low physical work  
34 demands, multi-adjusted significant positive associations with risk of all-cause mortality were found  
35 for age, smoking, low leisure time physical activity, high systolic and diastolic blood pressure, and  
36 low social class. Among males with moderate physical work demands, significant multi-adjusted  
37 positive associations with risk of all-cause mortality were found for age, smoking, alcohol con-  
38 sumption, low leisure time physical activity, high systolic blood pressure, and low physical fitness.  
39  
40  
41  
42  
43  
44  
45  
46  
47  
48  
49  
50  
51  
52  
53  
54 Among males with high physical work demands, significant multi-adjusted positive associations  
55 with risk of all-cause mortality were found for age, smoking, alcohol consumption, high diastolic  
56 blood pressure, low physical fitness, and low social class.  
57  
58  
59  
60

**COMMENTS**

The findings of this study support the hypothesis that risk factors for IHD and all-cause mortality have a divergent impact on people with different physical activity levels at work. However, the well-established risk factors smoking and high blood pressure were strongly associated with IHD mortality risk whether physical work demands were low, moderate, or high. With respect to alcohol consumption, we confirmed the well-known U- or J-shaped relationship with cardiovascular mortality risk,[15] with a lower risk among those with a moderate daily consumption. This relationship was consistent among those with low and moderate physical work demands, but absent among the group with the highest physical work demands.

Surprisingly, among men with moderate physical work demands, but not among others, those who reported exposure to regular psychological work pressure had a lower risk of IHD mortality than those who did not. This lower risk could not be attributed to underlying risk factor characteristics of men with and without perceived psychological work pressure. A biologically plausible explanation for this observation will be speculative.

Low physical activity in leisure time was a statistically significant risk factor among those with a moderate or high level of physical work demands. Among those with low physical work demands, the association was weaker and did not reach statistical significance. Only among men with high physical work demands, those with highest level of physical fitness had a significantly lower risk of IHD mortality compared to those with a low fitness level.

Physical fitness is a well established predictor of cardiovascular disease and mortality.[7, 16-18] In our study, considerable differences were found between men with different occupational physical demands in the predictive role of physical fitness for both IHD and all-cause mortality (data not shown). High physical fitness was found to reduce the risk for IHD mortality among men with high

1  
2 physical work demands with as much as 52%, but only modestly (22%) and non-significantly (9%)  
3  
4 among men with low and moderate physical work demands, respectively. Among men with moder-  
5  
6 ate physical work demands, a high physical fitness was though associated with reduced all-cause  
7  
8 mortality risk (38%). These findings add further support to our previous observation that men with  
9  
10 high physical work demands and high physical fitness do not have an increased risk of IHD mortal-  
11  
12 ity in contrast to men with high physical work demands and low physical fitness.[4]  
13  
14  
15  
16  
17

18  
19 Also the inverse association between leisure time physical activity and risk of IHD mortality was  
20  
21 most pronounced among men with moderate and high occupational physical activity. High or me-  
22  
23 dium leisure time physical activity reduced the risk of IHD mortality among men with moderate and  
24  
25 high occupational physical demands, with 63% and 44%, respectively. These findings indicate that  
26  
27 it is particularly important to be physically active during leisure time when having moderate or high  
28  
29 occupational physical activity for preventing IHD mortality.[3] The particular importance of leisure  
30  
31 time physical activity and high physical fitness among men with high physical work demands may  
32  
33 be because it will lower heart rate during daily activities and therefore improving myocardium per-  
34  
35 fusion, intravascular turbulence and wall shear stress among these workers with high cardiovascular  
36  
37 strain several hours per day.  
38  
39  
40  
41  
42  
43

44  
45 A methodological aspect of this study is that the information regarding physical work demands was  
46  
47 based on self-assessment, which invariably entails some degree of misclassification.[19] However,  
48  
49 no technical equipment for measuring daily physical activity at work and in leisure was available in  
50  
51 1970, at least not in Denmark. In addition, the lack of continuous exposure data and repeated meas-  
52  
53 ures of exposure during the relatively long follow-up period may have contributed to misclassifica-  
54  
55 tion of exposure. The study population of the Copenhagen Male Study is urban Danish male work-  
56  
57 ers between 40-59 years of age in 1970-1971. It is unknown whether the findings of this study are  
58  
59 relevant also for females, younger workers, self-employed or workers from other (e.g. rural) com-  
60

1  
2 communities and nationalities. Moreover, the workers with pre-existing cardiovascular disease were ex-  
3  
4 cluded from this study.  
5  
6  
7  
8

9 In conclusion, risk factors for IHD and all-cause mortality are not identical for men with different  
10 physical work demands. Low physical fitness and low leisure time physical activity was observed to  
11 only increase the risk for IHD mortality among men with high physical work demands. Preventive  
12 initiatives for IHD ought to be tailored to the physical work demands.  
13  
14  
15  
16  
17  
18  
19  
20  
21  
22  
23  
24  
25  
26  
27  
28  
29  
30  
31  
32  
33  
34  
35  
36  
37  
38  
39  
40  
41  
42  
43  
44  
45  
46  
47  
48  
49  
50  
51  
52  
53  
54  
55  
56  
57  
58  
59  
60

For peer review only

**Table 1. All men eligible for the incidence study. Lifestyle and other predictors of IHD mortality (n = 579, 11.8%) during the 30-year follow-up 1970/71 to 2001. Statistically significant results are highlighted (bold).**

|                                        | Cumulative incidence, % | Hazard Ratio <sup>c</sup> | Hazard Ratio <sup>d</sup> | Hazard Ratio <sup>e</sup> | Hazard Ratio <sup>f</sup> |
|----------------------------------------|-------------------------|---------------------------|---------------------------|---------------------------|---------------------------|
| Age                                    |                         |                           |                           |                           |                           |
| Youngest half (max 48 y), n=2,436      | 7.6%                    | na                        | 1 <sup>a</sup>            | 1 <sup>a</sup>            | 1 <sup>a</sup>            |
| Oldest half (> 48 y), n=2,470          | 16.0%                   |                           | <b>2.72(2.27-3.26)</b>    | <b>2.33(1.95-2.79)</b>    | <b>2.42(2.01-2.92)</b>    |
| Smoking                                |                         |                           |                           |                           |                           |
| Current, n=3,522                       | 12.7%                   | 1 <sup>a</sup>            | 1 <sup>a</sup>            | 1 <sup>a</sup>            | 1 <sup>a</sup>            |
| Previous, n=937                        | 9.9%                    | <b>0.66(0.53-0.82)</b>    | <b>0.68(0.54-0.86)</b>    | <b>0.57(0.45-0.71)</b>    | <b>0.60(0.47-0.75)</b>    |
| Never, n=446                           | 9.0%                    | <b>0.59(0.43-0.81)</b>    | <b>0.63(0.44-0.86)</b>    | <b>0.50(0.36-0.69)</b>    | <b>0.51(0.36-0.71)</b>    |
| Alcohol, beverages/d                   |                         |                           |                           |                           |                           |
| 0, n=1,658                             | 12.6%                   | 1 <sup>a</sup>            | 1 <sup>a</sup>            | 1 <sup>a</sup>            | 1 <sup>a</sup>            |
| 1-2, n=2,315                           | 10.6%                   | 0.84(0.70-1.01)           | <b>0.82(0.68-0.99)</b>    | <b>0.84(0.69-1.00)</b>    | 0.84(0.69-1.02)           |
| 3-5, n=764                             | 13.1%                   | 1.18(0.93-1.49)           | 1.06(0.83-1.36)           | 1.07(0.84-1.36)           | 0.87(0.68-1.13)           |
| 6+, n=151                              | 16.6%                   | 1.97(1.30-2.99)           | 1.73(1.13-2.65)           | 1.63(1.06-2.50)           | 1.14(0.73-1.77)           |
| Leisure time physical activity         |                         |                           |                           |                           |                           |
| Low, n=798                             | 15.4%                   | 1 <sup>a</sup>            | 1 <sup>a</sup>            | 1 <sup>a</sup>            | 1 <sup>a</sup>            |
| Medium, n=3,478                        | 11.3%                   | <b>0.68(0.56-0.84)</b>    | <b>0.71(0.58-0.87)</b>    | <b>0.70(0.57-0.86)</b>    | <b>0.73(0.59-0.89)</b>    |
| High, n=498                            | 8.1%                    | <b>0.51(0.35-0.73)</b>    | <b>0.54(0.38-0.78)</b>    | <b>0.57(0.40-0.82)</b>    | <b>0.62(0.43-0.90)</b>    |
| BMI                                    |                         |                           |                           |                           |                           |
| < 25, n=2,358                          | 10.1%                   | 1 <sup>a</sup>            | 1 <sup>a</sup>            | 1 <sup>a</sup>            | 1 <sup>a</sup>            |
| > 25 – 28, n=1,710                     | 11.9%                   | 1.11(0.92-1.34)           | 1.14(0.94-1.38)           | 0.97(0.80-1.18)           | 0.96(0.79-1.56)           |
| > 28, n=829                            | 16.7%                   | <b>1.66(1.34-2.04)</b>    | <b>1.67(1.34-2.08)</b>    | <b>1.25(1.0-1.56)</b>     | 1.23(0.97-1.56)           |
| Systolic BP, mm Hg                     |                         |                           |                           |                           |                           |
| < 120, n=1,383                         | 6.4%                    | 1 <sup>a</sup>            | 1 <sup>a</sup>            | 1 <sup>a</sup>            | 1 <sup>a</sup>            |
| > 120 – 150, n=2,869                   | 12.6%                   | <b>2.01(1.59-2.53)</b>    | <b>2.09(1.65-2.66)</b>    | <b>1.65(1.29-2.11)</b>    | <b>1.80(1.40-2.34)</b>    |
| > 150, n=650                           | 20.2%                   | <b>3.32(2.52-4.36)</b>    | <b>3.54(2.67-4.70)</b>    | <b>2.02(1.44-2.85)</b>    | <b>2.42(1.72-3.41)</b>    |
| Diastolic BP mm Hg                     |                         |                           |                           |                           |                           |
| < 75, n=1,421                          | 8.3%                    | 1 <sup>a</sup>            | 1 <sup>a</sup>            | 1 <sup>a</sup>            | 1 <sup>a</sup>            |
| >75-90, n=2,736                        | 11.4%                   | <b>1.38(1.11-1.70)</b>    | <b>1.48(1.19-1.84)</b>    | 1.16(0.93-1.45)           | 1.12(0.89-1.42)           |
| > 90, n=745                            | 20.0%                   | <b>2.79(2.12-3.44)</b>    | <b>2.91(2.26-3.75)</b>    | <b>1.66(1.21-2.27)</b>    | <b>1.74(1.27-2.37)</b>    |
| Hypertension <sup>b</sup>              |                         |                           |                           |                           |                           |
| No, n=4,826                            | 11.6%                   | 1 <sup>a</sup>            | 1 <sup>a</sup>            | 1 <sup>a</sup>            | 1 <sup>a</sup>            |
| Yes, n=77                              | 27.3%                   | <b>2.41(1.56-3.73)</b>    | <b>2.36(1.52-3.66)</b>    | 1.38(0.87-2.17)           | 1.46(0.92-2.30)           |
| Physical fitness (VO <sub>2</sub> Max) |                         |                           |                           |                           |                           |
| 15-26, n=882                           | 16.7%                   | 1 <sup>a</sup>            | 1 <sup>a</sup>            | 1 <sup>a</sup>            | 1 <sup>a</sup>            |
| 27-38, n=3,017                         | 11.5%                   | <b>0.74(0.61-0.90)</b>    | <b>0.76(0.62-0.93)</b>    | 0.88(0.71-1.07)           | 0.88(0.71-1.08)           |
| 39-78, n=1,007                         | 8.5%                    | <b>0.56(0.43-0.73)</b>    | <b>0.60(0.45-0.80)</b>    | 0.77(0.57-1.02)           | 0.78(0.58-1.05)           |
| Psychological pressure at work         |                         |                           |                           |                           |                           |
| No, n=3,834                            | 12.2%                   | 1 <sup>a</sup>            | 1 <sup>a</sup>            | 1 <sup>a</sup>            | 1 <sup>a</sup>            |
| Yes, n=1,060                           | 10.5%                   | 0.86(0.70-1.05)           | 0.86(0.70-1.07)           | 0.84(0.68-1.04)           | 0.88(0.70-1.10)           |
| Psychological pressure at leisure      |                         |                           |                           |                           |                           |
| No, n=4,556                            | 11.8%                   | 1 <sup>a</sup>            | 1 <sup>a</sup>            | 1 <sup>a</sup>            | 1 <sup>a</sup>            |
| Yes, n=332                             | 12.7%                   | 1.11(0.81-1.53)           | 1.04(0.75-1.44)           | 1.17(0.85-1.60)           | 1.14(0.81-1.61)           |
| Work hours/week                        |                         |                           |                           |                           |                           |
| < 40, n=628                            | 8.3%                    | 1 <sup>a</sup>            | 1 <sup>a</sup>            | 1 <sup>a</sup>            | 1 <sup>a</sup>            |
| 40-45, n=3,366                         | 12.9%                   | <b>1.62(1.22-2.16)</b>    | <b>1.57(1.17-2.10)</b>    | <b>1.57(1.17-2.09)</b>    | 1.25(0.92-1.69)           |
| > 45, n=911                            | 10.2%                   | 1.28(0.91-1.79)           | 1.33(0.94-1.88)           | 1.26(0.89-1.77)           | 1.12(0.79-1.59)           |
| Social class                           |                         |                           |                           |                           |                           |
| High (I,II,III), n=2,196               | 9.1%                    | 1 <sup>a</sup>            | 1 <sup>a</sup>            | 1 <sup>a</sup>            | 1 <sup>a</sup>            |
| Low (IV,V), n=2,688                    | 14.0%                   | <b>1.72(1.45-2.05)</b>    | <b>1.61(1.35-1.93)</b>    | <b>1.72(1.45-2.05)</b>    | <b>1.48(1.22-1.79)</b>    |

<sup>a</sup>: reference category

<sup>b</sup>: receives doctor's treatment due to hypertension

<sup>c</sup>: adjusted for age; <sup>d</sup>: adjusted for age + lifestyle (smoking, LTPA, alcohol); <sup>e</sup>: adjusted for age + clinical factors (BMI, blood pressure including treatment for, physical fitness); <sup>f</sup>: age + all other confounders/risk factors (lifestyle, clinical factors, psychosocial stress at work and leisure, number of work hours, and social class  
na: not applicable



**Table 2. Men with low physical work demands only, n = 1,219. Lifestyle and other predictors of IHD mortality (n = 118, 9.7%) during the 30-year follow-up 1970/71 to 2001. Statistically significant results are highlighted (bold).**

|                                        | Cumulative incidence, % | Hazard Ratio <sup>c</sup> | Hazard Ratio <sup>d</sup> | Hazard Ratio <sup>e</sup> | Hazard Ratio <sup>f</sup> |
|----------------------------------------|-------------------------|---------------------------|---------------------------|---------------------------|---------------------------|
| Age                                    |                         |                           |                           |                           |                           |
| Youngest half (max 48 y), n=602        | 7.5%                    | na                        | 1 <sup>a</sup>            | 1 <sup>a</sup>            | 1 <sup>a</sup>            |
| Oldest half (> 48 y), n=617            | 11.9%                   |                           | <b>1.90(1.31-2.76)</b>    | <b>1.72(1.17-2.52)</b>    | <b>1.75(1.19-2.58)</b>    |
| Smoking                                |                         |                           |                           |                           |                           |
| Current, n=808                         | 9.5%                    | 1 <sup>a</sup>            | 1 <sup>a</sup>            | 1 <sup>a</sup>            | 1 <sup>a</sup>            |
| Previous, n=275                        | 11.7%                   | 1.12(0.74-1.69)           | 1.07(0.71-1.62)           | 1.03(0.68-1.56)           | 0.96(0.63-1.47)           |
| Never, n=135                           | 7.4%                    | 0.67(0.35-1.30)           | 0.58(0.30-1.14)           | 0.56(0.29-1.10)           | 0.51(0.25-1.02)           |
| Alcohol, beverages/d                   |                         |                           |                           |                           |                           |
| 0, n=478                               | 12.0%                   | 1 <sup>a</sup>            | 1 <sup>a</sup>            | 1 <sup>a</sup>            | 1 <sup>a</sup>            |
| 1-2, n=617                             | 7.5%                    | <b>0.59(0.40-0.88)</b>    | <b>0.58(0.40-0.86)</b>    | <b>0.56(0.38-0.83)</b>    | <b>0.59(0.40-0.88)</b>    |
| 3-5, n=110                             | 13.6%                   | 1.26(0.72-2.23)           | 1.15(0.65-2.05)           | 1.08(0.60-1.91)           | 1.04(0.57-1.89)           |
| 6+, n=12                               | 0%                      | na                        | na                        | na                        | na                        |
| Leisure time physical activity         |                         |                           |                           |                           |                           |
| Low, n=227                             | 12.8%                   | 1 <sup>a</sup>            | 1 <sup>a</sup>            | 1 <sup>a</sup>            | 1 <sup>a</sup>            |
| Medium, n=859                          | 8.9%                    | 0.66(0.43-1.02)           | <b>0.65(0.42-1.0)</b>     | 0.74(0.48-1.15)           | 0.74(0.47-1.15)           |
| High, n=130                            | 10.0%                   | 0.74(0.38-1.42)           | 0.70(0.36-1.35)           | 0.86(0.44-1.68)           | 0.76(0.38-1.53)           |
| BMI                                    |                         |                           |                           |                           |                           |
| < 25, n=690                            | 8.2%                    | 1 <sup>a</sup>            | 1 <sup>a</sup>            | 1 <sup>a</sup>            | 1 <sup>a</sup>            |
| > 25 – 28, n=381                       | 10.3%                   | 1.25(0.83-1.89)           | 1.30(0.86-1.96)           | 0.99(0.65-1.52)           | 1.04(0.68-1.60)           |
| > 28, n=146                            | 15.8%                   | <b>1.93(1.19-3.15)</b>    | <b>1.79(1.09-2.92)</b>    | 1.35(0.81-2.26)           | 1.17(0.69-1.98)           |
| Systolic BP, mm Hg                     |                         |                           |                           |                           |                           |
| < 120, n=337                           | 4.5%                    | 1 <sup>a</sup>            | 1 <sup>a</sup>            | 1 <sup>a</sup>            | 1 <sup>a</sup>            |
| > 120 – 150, n=720                     | 10.4%                   | <b>2.62(1.50-4.56)</b>    | <b>2.46(1.41-4.29)</b>    | <b>1.90(1.07-3.39)</b>    | 1.62(0.89-2.95)           |
| > 150, n=160                           | 17.5%                   | <b>4.50(2.38-8.49)</b>    | <b>4.55(2.41-8.60)</b>    | 1.80(0.81-4.02)           | <b>2.34(1.10-4.99)</b>    |
| Diastolic BP mm Hg                     |                         |                           |                           |                           |                           |
| < 75, n=338                            | 4.5%                    | 1 <sup>a</sup>            | 1 <sup>a</sup>            | 1 <sup>a</sup>            | 1 <sup>a</sup>            |
| >75-90, n=680                          | 9.9%                    | <b>2.42(1.38-4.24)</b>    | <b>2.43(1.39-4.27)</b>    | <b>2.04(1.15-3.64)</b>    | <b>1.94(1.07-3.53)</b>    |
| > 90, n=199                            | 18.2%                   | <b>5.03(2.75-9.20)</b>    | <b>4.90(2.67-9.0)</b>     | <b>2.93(1.40-6.12)</b>    | <b>3.21(1.56-6.60)</b>    |
| Hypertension <sup>b</sup>              |                         |                           |                           |                           |                           |
| No, n=1196                             | 9.5%                    | 1 <sup>a</sup>            | 1 <sup>a</sup>            | 1 <sup>a</sup>            | 1 <sup>a</sup>            |
| Yes, n=23                              | 21.7%                   | 1.85(0.75-4.56)           | 2.28(0.91-5.66)           | 0.92(0.36-2.33)           | 1.20(0.46-3.12)           |
| Physical fitness (VO <sub>2</sub> Max) |                         |                           |                           |                           |                           |
| 15-26, n=238                           | 13.9%                   | 1 <sup>a</sup>            | 1 <sup>a</sup>            | 1 <sup>a</sup>            | 1 <sup>a</sup>            |
| 27-38, n=749                           | 8.7%                    | <b>0.65(0.42-0.99)</b>    | 0.67(0.44-1.03)           | 0.81(0.52-1.26)           | 0.82(0.53-1.27)           |
| 39-78, n=232                           | 8.7%                    | 0.68(0.38-1.19)           | 0.70(0.39-1.25)           | 0.98(0.54-1.78)           | 0.91(0.49-1.66)           |
| Psychological pressure at work         |                         |                           |                           |                           |                           |
| No, n=830                              | 9.6%                    | 1 <sup>a</sup>            | 1 <sup>a</sup>            | 1 <sup>a</sup>            | 1 <sup>a</sup>            |
| Yes, n=386                             | 10.2%                   | 1.15(0.79-1.70)           | 1.11(0.76-1.64)           | 1.10(0.74-1.61)           | 1.02(0.68-1.55)           |
| Psychological pressure at leisure      |                         |                           |                           |                           |                           |
| No, n=1,107                            | 9.6%                    | 1 <sup>a</sup>            | 1 <sup>a</sup>            | 1 <sup>a</sup>            | 1 <sup>a</sup>            |
| Yes, n=109                             | 11.1%                   | 1.18(0.65-2.15)           | 1.09(0.59-2.01)           | 1.34(0.73-2.45)           | 1.35(0.71-2.58)           |
| Work hours/week                        |                         |                           |                           |                           |                           |
| < 40, n=209                            | 8.1%                    | 1 <sup>a</sup>            | 1 <sup>a</sup>            | 1 <sup>a</sup>            | 1 <sup>a</sup>            |
| 40-45, n=738                           | 10.9%                   | 1.35(0.80-2.29)           | 1.31(0.78-2.23)           | 1.26(0.74-2.13)           | 1.11(0.65-1.90)           |
| > 45, n=272                            | 7.7%                    | 0.95(0.50-1.80)           | 0.93(0.48-1.77)           | 0.98(0.51-1.86)           | 0.84(0.43-1.63)           |
| Social class                           |                         |                           |                           |                           |                           |
| High (I,II,III), n=946                 | 8.5%                    | 1 <sup>a</sup>            | 1 <sup>a</sup>            | 1 <sup>a</sup>            | 1 <sup>a</sup>            |
| Low (IV, V), n=260                     | 13.8%                   | <b>1.69(1.14-2.51)</b>    | <b>1.61(1.08-2.41)</b>    | <b>1.69(1.13-2.53)</b>    | 1.45(0.96-2.20)           |

<sup>a</sup>: reference category

<sup>b</sup>: receives doctor's treatment due to hypertension

<sup>c</sup>: adjusted for age; <sup>d</sup>: adjusted for age + lifestyle (smoking, LTPA, alcohol); <sup>e</sup>: adjusted for age + clinical factors (BMI, blood pressure including treatment for, physical fitness); <sup>f</sup>: age + all other confounders/risk factors (lifestyle, clinical factors, psychosocial stress at work and leisure, number of work hours, and social class  
na: not applicable



**Table 3. Men with moderate physical work demands only, n= 2,636. Lifestyle and other predictors of IHD mortality (n = 312, 11.8%) during the 30-year follow-up 1970/71 to 2001. Statistically significant results are highlighted (bold).**

|                                        | Cumulative incidence, % | Hazard Ratio <sup>c</sup> | Hazard Ratio <sup>d</sup> | Hazard Ratio <sup>e</sup> | Hazard Ratio <sup>f</sup> |
|----------------------------------------|-------------------------|---------------------------|---------------------------|---------------------------|---------------------------|
| Age                                    |                         |                           |                           |                           |                           |
| Youngest half (max 48 y), n=1,316      | 7.2%                    | na                        | 1 <sup>a</sup>            | 1 <sup>a</sup>            | 1 <sup>a</sup>            |
| Oldest half (> 48 y), n=1,320          | 16.6%                   |                           | <b>2.98(2.33-3.81)</b>    | <b>2.69(2.10-3.45)</b>    | <b>2.74(2.13-3.52)</b>    |
| Smoking                                |                         |                           |                           |                           |                           |
| Current, n=1,901                       | 13.0%                   | 1 <sup>a</sup>            | 1 <sup>a</sup>            | 1 <sup>a</sup>            | 1 <sup>a</sup>            |
| Previous, n=502                        | 8.8%                    | <b>0.57(0.41-0.78)</b>    | <b>0.59(0.43-0.82)</b>    | <b>0.47(0.34-0.65)</b>    | <b>0.52(0.38-0.73)</b>    |
| Never, n=233                           | 9.0%                    | <b>0.57(0.37-0.89)</b>    | <b>0.60(0.39-0.95)</b>    | <b>0.52(0.33-0.81)</b>    | <b>0.53(0.33-0.83)</b>    |
| Alcohol, beverages/d                   |                         |                           |                           |                           |                           |
| 0, n=898                               | 13.1%                   | 1 <sup>a</sup>            | 1 <sup>a</sup>            | 1 <sup>a</sup>            | 1 <sup>a</sup>            |
| 1-2, n=1,250                           | 10.7%                   | 0.82(0.64-1.05)           | 0.83(0.64-1.06)           | 0.83(0.64-1.06)           | 0.84(0.65-1.09)           |
| 3-5, n=404                             | 11.7%                   | 1.00(0.71-1.41)           | 0.95(0.68-1.34)           | 0.93(0.66-1.31)           | 0.82(0.58-1.17)           |
| 6+, n=74                               | 18.9%                   | 2.25(1.29-3.92)           | 2.06(1.17-3.60)           | 1.85(1.03-3.32)           | 1.31(0.72-2.38)           |
| Leisure time physical activity         |                         |                           |                           |                           |                           |
| Low, n=409                             | 14.9%                   | 1 <sup>a</sup>            | 1 <sup>a</sup>            | 1 <sup>a</sup>            | 1 <sup>a</sup>            |
| Medium, n=1,978                        | 12.1%                   | <b>0.73(0.55-0.96)</b>    | 0.76(0.57-1.01)           | <b>0.73(0.55-0.97)</b>    | 0.78(0.59-1.04)           |
| High, n=240                            | 4.6%                    | <b>0.29(0.15-0.55)</b>    | <b>0.32(0.17-0.60)</b>    | <b>0.32(0.17-0.60)</b>    | <b>0.37(0.19-0.72)</b>    |
| BMI                                    |                         |                           |                           |                           |                           |
| < 25, n=1,220                          | 10.0%                   | 1 <sup>a</sup>            | 1 <sup>a</sup>            | 1 <sup>a</sup>            | 1 <sup>a</sup>            |
| > 25 – 28, n=957                       | 12.3%                   | 1.13(0.87-1.45)           | 1.12(0.87-1.45)           | 1.03(0.79-1.34)           | 1.02(0.78-1.32)           |
| > 28, n=454                            | 16.1%                   | <b>1.56(1.16-2.09)</b>    | <b>1.54(1.14-2.08)</b>    | 1.21(0.88-1.65)           | 1.19(0.86-1.65)           |
| Systolic BP, mm Hg                     |                         |                           |                           |                           |                           |
| < 120, n=757                           | 6.9%                    | 1 <sup>a</sup>            | 1 <sup>a</sup>            | 1 <sup>a</sup>            | 1 <sup>a</sup>            |
| > 120 – 150, n=1,523                   | 12.5%                   | <b>1.77(1.30-2.41)</b>    | <b>1.93(1.41-2.63)</b>    | <b>1.54(1.11-2.13)</b>    | <b>1.82(1.31-2.54)</b>    |
| > 150, n=355                           | 19.5%                   | <b>2.87(1.99-4.12)</b>    | <b>3.27(2.26-4.73)</b>    | <b>2.00(1.27-3.16)</b>    | <b>2.56(1.64-4.01)</b>    |
| Diastolic BP mm Hg                     |                         |                           |                           |                           |                           |
| < 75, n=768                            | 8.9%                    | 1 <sup>a</sup>            | 1 <sup>a</sup>            | 1 <sup>a</sup>            | 1 <sup>a</sup>            |
| >75-90, n=1,491                        | 11.7%                   | 1.26(0.95-1.67)           | <b>1.35(1.02-1.80)</b>    | 1.07(0.80-1.44)           | 1.01(0.75-1.37)           |
| > 90, n=376                            | 18.6%                   | <b>2.25(1.61-3.14)</b>    | <b>2.50(1.78-3.52)</b>    | 1.42(0.92-2.20)           | 1.39(0.91-2.12)           |
| Hypertension <sup>b</sup>              |                         |                           |                           |                           |                           |
| No, n=2,592                            | 11.6%                   | 1 <sup>a</sup>            | 1 <sup>a</sup>            | 1 <sup>a</sup>            | 1 <sup>a</sup>            |
| Yes, n=41                              | 26.8%                   | <b>2.95(1.61-5.40)</b>    | <b>2.90(1.58-5.32)</b>    | 1.74(0.92-3.32)           | 1.51(0.80-2.87)           |
| Physical fitness (VO <sub>2</sub> Max) |                         |                           |                           |                           |                           |
| 15-26, n=465                           | 16.4%                   | 1 <sup>a</sup>            | 1 <sup>a</sup>            | 1 <sup>a</sup>            | 1 <sup>a</sup>            |
| 27-38, n=1,616                         | 11.8%                   | 0.79(0.60-1.03)           | 0.78(0.60-1.03)           | 0.89(0.67-1.18)           | 0.92(0.69-1.22)           |
| 39-78, n=555                           | 8.3%                    | <b>0.56(0.39-0.82)</b>    | <b>0.59(0.41-0.86)</b>    | 0.73(0.49-1.09)           | 0.78(0.53-1.17)           |
| Psychological pressure at work         |                         |                           |                           |                           |                           |
| No, n=2,133                            | 12.6%                   | 1 <sup>a</sup>            | 1 <sup>a</sup>            | 1 <sup>a</sup>            | 1 <sup>a</sup>            |
| Yes, n=496                             | 8.5%                    | <b>0.65(0.47-0.90)</b>    | <b>0.70(0.48-0.93)</b>    | <b>0.64(0.46-0.89)</b>    | <b>0.68(0.48-0.96)</b>    |
| Psychological pressure at leisure      |                         |                           |                           |                           |                           |
| No, n=2,462                            | 11.9%                   | 1 <sup>a</sup>            | 1 <sup>a</sup>            | 1 <sup>a</sup>            | 1 <sup>a</sup>            |
| Yes, n=163                             | 11.7%                   | 1.12(0.71-1.79)           | 1.14(0.72-1.83)           | 1.17(0.73-1.87)           | 1.26(0.77-2.06)           |
| Work hours/week                        |                         |                           |                           |                           |                           |
| < 40, n=341                            | 7.9%                    | 1 <sup>a</sup>            | 1 <sup>a</sup>            | 1 <sup>a</sup>            | 1 <sup>a</sup>            |
| 40-45, n=1,865                         | 13.1%                   | <b>1.71(1.14-2.54)</b>    | <b>1.61(1.08-2.40)</b>    | <b>1.66(1.11-2.47)</b>    | 1.31(0.87-1.96)           |
| > 45, n=429                            | 9.8%                    | 1.26(0.78-2.04)           | 1.34(0.82-2.17)           | 1.25(0.77-2.06)           | 1.16(0.71-1.89)           |
| Social class                           |                         |                           |                           |                           |                           |
| High (I,II,III), n=1,075               | 9.2%                    | 1 <sup>a</sup>            | 1 <sup>a</sup>            | 1 <sup>a</sup>            | 1 <sup>a</sup>            |
| Low (IV, V), n=1,554                   | 13.7%                   | <b>1.64(1.29-2.08)</b>    | <b>1.53(1.20-1.95)</b>    | <b>1.62(1.27-2.07)</b>    | <b>1.35(1.05-1.75)</b>    |

<sup>a</sup>: reference category

<sup>b</sup>: receives doctor's treatment due to hypertension

<sup>c</sup>: adjusted for age; <sup>d</sup>: adjusted for age + lifestyle (smoking, LTPA, alcohol); <sup>e</sup>: adjusted for age + clinical factors (BMI, blood pressure including treatment for, physical fitness); <sup>f</sup>: age + all other confounders/risk factors (lifestyle, clinical factors, psychosocial stress at work and leisure, number of work hours, and social class  
na: not applicable

**Table 4. Men with high physical work demands only, n= 846. Lifestyle and other predictors of IHD mortality (n = 119, 14.1%) during the 30-year follow-up 1970/71 to 2001. Statistically significant results are highlighted (bold).**

|                                        | Cumulative incidence, % | Hazard Ratio <sup>c</sup> | Hazard Ratio <sup>d</sup> | Hazard Ratio <sup>e</sup> | Hazard Ratio <sup>f</sup> |
|----------------------------------------|-------------------------|---------------------------|---------------------------|---------------------------|---------------------------|
| Age                                    |                         |                           |                           |                           |                           |
| Youngest half (max 48 y), n=420        | 8.6%                    | na                        | 1 <sup>a</sup>            | 1 <sup>a</sup>            | 1 <sup>a</sup>            |
| Oldest half (> 48 y), n=426            | 19.5%                   |                           | <b>3.16(2.12-4.71)</b>    | <b>2.48(1.64-3.73)</b>    | <b>2.52(1.66-3.83)</b>    |
| Smoking                                |                         |                           |                           |                           |                           |
| Current, n=648                         | 15.3%                   | 1 <sup>a</sup>            | 1 <sup>a</sup>            | 1 <sup>a</sup>            | 1 <sup>a</sup>            |
| Previous, n=131                        | 9.2%                    | <b>0.46(0.25-0.84)</b>    | <b>0.45(0.24-0.82)</b>    | <b>0.40(0.22-0.73)</b>    | <b>0.38(0.20-0.71)</b>    |
| Never, n=67                            | 11.9%                   | 0.67(0.32-1.37)           | 0.71(0.34-1.46)           | 0.47(0.22-1.03)           | 0.49(0.22-1.09)           |
| Alcohol, beverages/d                   |                         |                           |                           |                           |                           |
| 0, n=218                               | 12.4%                   | 1 <sup>a</sup>            | 1 <sup>a</sup>            | 1 <sup>a</sup>            | 1 <sup>a</sup>            |
| 1-2, n=355                             | 15.2%                   | 1.23(0.78-1.96)           | 1.23(0.77-1.95)           | 1.31(0.81-2.11)           | 1.41(0.87-2.29)           |
| 3-5, n=208                             | 13.0%                   | 1.11(0.65-1.90)           | 1.00(0.58-1.72)           | 1.14(0.65-1.98)           | 0.95(0.53-1.67)           |
| 6+, n=60                               | 16.7%                   | <b>2.10(1.01-4.35)</b>    | 1.84(0.88-3.84)           | 2.05(0.97-4.33)           | 1.43(0.67-3.05)           |
| Leisure time physical activity         |                         |                           |                           |                           |                           |
| Low, n=144                             | 20.8%                   | 1 <sup>a</sup>            | 1 <sup>a</sup>            | 1 <sup>a</sup>            | 1 <sup>a</sup>            |
| Medium, n=586                          | 12.6%                   | <b>0.62(0.40-0.95)</b>    | <b>0.59(0.38-0.90)</b>    | <b>0.62(0.40-0.96)</b>    | <b>0.56(0.36-0.88)</b>    |
| High, n=114                            | 13.2%                   | 0.67(0.36-1.26)           | 0.64(0.34-1.21)           | 0.80(0.42-1.52)           | 0.77(0.40-1.48)           |
| BMI                                    |                         |                           |                           |                           |                           |
| < 25, n=351                            | 12.8%                   | 1 <sup>a</sup>            | 1 <sup>a</sup>            | 1 <sup>a</sup>            | 1 <sup>a</sup>            |
| > 25 – 28, n=299                       | 12.0%                   | 0.82(0.53-1.28)           | 0.87(0.56-1.36)           | 0.66(0.42-1.05)           | 0.73(0.45-1.17)           |
| > 28, n=194                            | 18.6%                   | 1.37(0.88-2.13)           | 1.34(0.84-2.12)           | 1.02(0.64-1.62)           | 1.08(0.66-1.76)           |
| Systolic BP, mm Hg                     |                         |                           |                           |                           |                           |
| < 120, n=238                           | 7.1%                    | 1 <sup>a</sup>            | 1 <sup>a</sup>            | 1 <sup>a</sup>            | 1 <sup>a</sup>            |
| > 120 – 150, n=499                     | 15.2%                   | <b>2.02(1.19-3.42)</b>    | <b>2.16(1.27-3.68)</b>    | 1.68(0.96-2.95)           | <b>1.93(1.07-3.46)</b>    |
| > 150, n=108                           | 24.1%                   | <b>3.20(1.72-5.95)</b>    | <b>3.41(1.81-6.44)</b>    | 2.13(0.97-4.66)           | 2.14(0.98-4.66)           |
| Diastolic BP mm Hg                     |                         |                           |                           |                           |                           |
| < 75, n=253                            | 11.5%                   | 1 <sup>a</sup>            | 1 <sup>a</sup>            | 1 <sup>a</sup>            | 1 <sup>a</sup>            |
| >75-90, n=455                          | 12.5%                   | 1.05(0.67-1.64)           | 1.05(0.67-1.66)           | 0.90(0.55-1.46)           | 0.79(0.47-1.30)           |
| > 90, n=137                            | 24.1%                   | <b>2.18(1.32-3.60)</b>    | <b>2.53(1.51-4.23)</b>    | 1.43(0.73-2.78)           | 1.60(0.83-3.09)           |
| Hypertension <sup>b</sup>              |                         |                           |                           |                           |                           |
| No, n=834                              | 13.8%                   | 1 <sup>a</sup>            | 1 <sup>a</sup>            | 1 <sup>a</sup>            | 1 <sup>a</sup>            |
| Yes, n=12                              | 33.3%                   | 2.32(0.85-6.30)           | 2.12(0.76-5.90)           | 1.80(0.64-5.13)           | 1.82(0.62-5.34)           |
| Physical fitness (VO <sub>2</sub> Max) |                         |                           |                           |                           |                           |
| 15-26, n=125                           | 23.2%                   | 1 <sup>a</sup>            | 1 <sup>a</sup>            | 1 <sup>a</sup>            | 1 <sup>a</sup>            |
| 27-38, n=531                           | 13.9%                   | <b>0.65(0.42-1.00)</b>    | <b>0.63(0.40-0.99)</b>    | 0.73(0.46-1.16)           | 0.70(0.43-1.13)           |
| 39-78, n=190                           | 8.4%                    | 0.41(0.22-0.76)           | 0.39(0.21-0.74)           | 0.54(0.27-1.06)           | <b>0.48(0.24-0.96)</b>    |
| Psychological pressure at work         |                         |                           |                           |                           |                           |
| No, n=708                              | 13.8%                   | 1 <sup>a</sup>            | 1 <sup>a</sup>            | 1 <sup>a</sup>            | 1 <sup>a</sup>            |
| Yes, n=136                             | 14.7%                   | 1.01(0.62-1.63)           | 1.08(0.66-1.76)           | 0.98(0.60-1.60)           | 1.04(0.61-1.78)           |
| Psychological pressure at leisure      |                         |                           |                           |                           |                           |
| No, n=795                              | 14.0%                   | 1 <sup>a</sup>            | 1 <sup>a</sup>            | 1 <sup>a</sup>            | 1 <sup>a</sup>            |
| Yes, n=47                              | 17.0%                   | 1.11(0.54-2.27)           | 1.15(0.56-2.37)           | 1.04(0.50-2.14)           | 1.09(0.51-2.30)           |
| Work hours/week                        |                         |                           |                           |                           |                           |
| < 40, n=51                             | 9.8%                    | 1 <sup>a</sup>            | 1 <sup>a</sup>            | 1 <sup>a</sup>            | 1 <sup>a</sup>            |
| 40-45, n=618                           | 14.6%                   | 1.50(0.61-3.70)           | 1.68(0.68-4.19)           | 1.47(0.60-3.63)           | 1.54(0.62-3.85)           |
| > 45, n=177                            | 13.6%                   | 1.49(0.57-3.89)           | 1.81(0.68-4.86)           | 1.38(0.52-3.64)           | 1.58(0.70-3.18)           |
| Social class                           |                         |                           |                           |                           |                           |
| High (I,II,III), n=74                  | 10.8%                   | 1 <sup>a</sup>            | 1 <sup>a</sup>            | 1 <sup>a</sup>            | 1 <sup>a</sup>            |
| Low (IV, V), n=771                     | 14.3%                   | 1.47(0.72-3.01)           | 1.43(0.69-2.96)           | 1.55(0.75-3.18)           | 1.49(0.70-3.18)           |

<sup>a</sup>: reference category

<sup>b</sup>: receives doctor's treatment due to hypertension

<sup>c</sup>: adjusted for age; <sup>d</sup>: adjusted for age + lifestyle (smoking, LTPA, alcohol); <sup>e</sup>: adjusted for age + clinical factors (BMI, blood pressure including treatment for, physical fitness); <sup>f</sup>: age + all other confounders/risk factors (lifestyle, clinical factors, psychosocial stress at work and leisure, number of work hours, and social class  
na: not applicable

1  
2 **CONTRIBUTORS** All authors contributed to the conception, design, interpretation of data, and  
3 writing or critically revising the manuscript. PS made the statistical analyses. AH and PS are guar-  
4 antors.  
5  
6

7 **ACKNOWLEDGEMENT** The King Christian X's Foundation, The Danish Medical Research Coun-  
8 cil, The Danish Heart Foundation, and The Else & Mogens Wedell-Wedellsborg Foundation.  
9

10 **CONFLICTS OF INTEREST** None  
11

12 **COMPETING INTEREST STATEMENT** None. All authors declare that the answer to the ques-  
13 tions on your competing interest form Exclusive licence  
14

15 (<http://bmj.com/cgi/content/full/317/7154/291/DC1>) are all No and therefore have nothing to de-  
16 clare.  
17  
18

19 **COPYRIGHT** "The Corresponding Author has the right to grant on behalf of all authors and does  
20 grant on behalf of all authors, an exclusive licence (or non exclusive for government employees) on  
21 a worldwide basis to the BMJ Publishing Group Ltd and its Licensees to permit this article (if ac-  
22 cepted) to be published in HEART editions and any other BMJPGJL products to exploit all subsidi-  
23 ary rights"  
24  
25  
26  
27  
28  
29  
30

31 **FUNDING** The study is a part of the Physical work demands and fitness project, financed by the  
32 Danish Working Environment Research Foundation.  
33

34 **ETHICAL APPROVAL** When the Copenhagen Male Study (CMS) was initiated as a closed co-  
35 hort study in 1970-71 no ethics committee for medical research had been established in Denmark.  
36 However, in 1985-86, when survivors from the first baseline were re-examined, the study was ap-  
37 proved by the ethics committee for medical research in the county of Copenhagen, and all partici-  
38 pants in the study gave informed consent to participate, as stated in many previous publications  
39 from the CMS based on analyses using the 1985-86 baseline.  
40  
41  
42  
43  
44

45 **ORIGINALE STUDY PROTOCOL** It does not exist  
46  
47

48 **DATA SHARING STATEMENT** Technical appendix and statistical code available from the  
49 corresponding author at [aho@nrcwe.dk](mailto:aho@nrcwe.dk). Consent was not obtained, but the presented data are  
50 anonymised and risk of identification is very low. No additional data available.  
51  
52  
53  
54  
55  
56  
57  
58  
59  
60

1  
2  
3  
4  
5  
6  
7  
8  
9  
10  
11  
12  
13  
14  
15  
16  
17  
18  
19  
20  
21  
22  
23  
24  
25  
26  
27  
28  
29  
30  
31  
32  
33  
34  
35  
36  
37  
38  
39  
40  
41  
42  
43  
44  
45  
46  
47  
48  
49  
50  
51  
52  
53  
54  
55  
56  
57  
58  
59  
60**REFERENCES**

- 1 World Health Organization (WHO). Global burden of disease: 2004 Update. Geneva: WHO 2008:153.
- 2 Nurminen M, Karjalainen A. Epidemiologic estimate of the proportion of fatalities related to occupational factors in Finland. *Scandinavian Journal of Work Environment & Health* 2001;**27**:295.
- 3 Holtermann A, Mortensen OS, Burr H, *et al.* The interplay between physical activity at work and during leisure time - risk of ischemic heart disease and all-cause mortality in middle-aged Caucasian men. *Scandinavian Journal of Work & Environmental Health* 2009;**35**:466-74.
- 4 Holtermann A, Mortensen OS, Burr H, *et al.* Physical demands at work, physical fitness, and 30-year ischaemic heart disease and all-cause mortality in The Copenhagen Male Study. *Scandinavian Journal of Work & Environmental Health* 2010;**36**:357-65.
- 5 Krause N, Brand RJ, Kaplan GA, *et al.* Occupational physical activity, energy expenditure and 11-year progression of carotid atherosclerosis. *Scandinavian Journal of Work and Environmental Health* 2007;**33**:405-24.
- 6 Glagov S, Zarins C, Giddens DP, *et al.* Hemodynamics and atherosclerosis - Insights and perspectives gained from studies of human arteries. *Archives of Pathology & Laboratory Medicine* 1988;**112**:1018-31.
- 7 Blair SN, Kampert JB, Kohl HW, *et al.* Influences of cardiorespiratory fitness and other precursors on cardiovascular disease and all-cause mortality in men and women. *Journal of the American Medical Association* 1996;**276**:205-10.
- 8 Eicher JD, Maresh CM, Tsongalis GJ, *et al.* The additive blood pressure lowering effects of exercise intensity on post-exercise hypotension. *American Heart Journal* 2010;**160**:513-20.
- 9 Gyntelberg F. Physical fitness and coronary heart-disease male residents in copenhagen aged 40-59. *Danish Medical Bulletin* 1973;**20**:1-4.
- 10 Gyntelberg F. One-year and 2-years incidence of myocardial-infarction in copenhagen males aged 40-59. *Danish Medical Bulletin* 1975;**22**:81-4.
- 11 Hein HO, Suadicani P, Gyntelberg F. Ischaemic heart disease incidence by social class and form of smoking: the Copenhagen Male Study-17 years' follow-up. *J Intern Med* 1992;**231**:477-83.
- 12 Åstrand P-O, Rodahl K. *Textbook of work physiology. Physiological bases of exercise.* New York: McGraw-Hill Book Company 1986.
- 13 Svalastoga K. *Prestige, class and mobility.* Copenhagen: Munksgaard 1959.
- 14 Hansen EJ. *Social groups in Denmark.* Copenhagen: The Danish National Centre for Social Research 1984.

- 1  
2  
3  
4  
5  
6  
7  
8  
9  
10  
11  
12  
13  
14  
15  
16  
17  
18  
19  
20  
21  
22  
23  
24  
25  
26  
27  
28  
29  
30  
31  
32  
33  
34  
35  
36  
37  
38  
39  
40  
41  
42  
43  
44  
45  
46  
47  
48  
49  
50  
51  
52  
53  
54  
55  
56  
57  
58  
59  
60
- 15 Ronksley PE, Brien SE, Turner BJ, *et al.* Association of alcohol consumption with selected cardiovascular disease outcomes: a systematic review and meta-analysis. *BMJ* 2011;**342**.
- 16 Blair SN, Kohl HW, Paffenbarger RS, *et al.* Physical-fitness and all-cause mortality - a prospective-study of healthy-men and women. *JAMA* 1989;**262**:2395-401.
- 17 Erikssen G, Liestøl K, Bjørnholt J, *et al.* Changes in physical fitness and changes in mortality. *The Lancet* 1998;**352**:759-62.
- 18 Hein HO, Suadicani P, Gyntelberg F. Physical-fitness or physical-activity as a predictor of ischemic-heart-disease - A 17-year follow-up in the Copenhagen Male Study. *Journal of Internal Medicine* 1992;**232**:471-9.
- 19 Sallis JF, Saelens BE. Assessment of physical activity by self-report: Status, limitations, and future directions. *Research Quarterly for Exercise and Sport* 2000;**71**:S1-S14.

1 STROBE Statement—Checklist of items that should be included in reports of *cohort studies*

|                           | Item No | Recommendation              |
|---------------------------|---------|-----------------------------|
| <b>Title and abstract</b> | 1       | Page 1                      |
|                           |         | Page 2                      |
| <b>Introduction</b>       |         |                             |
| Background/rationale      | 2       | Page 3                      |
| Objectives                | 3       | Page 3                      |
| <b>Methods</b>            |         |                             |
| Study design              | 4       | Page 4 and 7                |
| Setting                   | 5       | Page 4                      |
| Participants              | 6       | Page 4                      |
| Variables                 | 7       | Page 4, 5 and 6             |
| Data sources/ measurement | 8       | Page 4, 5 and 6             |
| Bias                      | 9       | Page 7                      |
| Study size                | 10      | Page 4 and 7                |
| Quantitative variables    | 11      | Page 4, 5 and 6             |
| Statistical methods       | 12      | Page 7                      |
|                           |         | Page 7                      |
| <b>Results</b>            |         |                             |
| Participants              | 13      | Page 8                      |
|                           |         | Page 8                      |
| Descriptive data          | 14      | Page 8                      |
|                           |         | Page 8                      |
|                           |         | Page 8                      |
| Outcome data              | 15      | Page 8 and table 1-5        |
| Main results              | 16      | Table 1-5                   |
|                           |         | Page 8 and 9                |
|                           |         | Table 1-5                   |
| Other analyses            | 17      | No other analyses were done |
| <b>Discussion</b>         |         |                             |
| Key results               | 18      | Page 9                      |
| Limitations               | 19      | Page 11                     |
| Interpretation            | 20      | Page 10 and 11              |
| Generalisability          | 21      | Page 10 and 11              |
| <b>Other information</b>  |         |                             |
| Funding                   | 22      | Page 19                     |

54  
55  
56  
57  
58  
59  
60

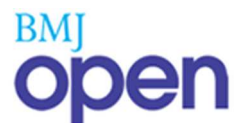

**Risk factors for ischaemic heart disease mortality among men with different occupational physical demands. A 30-year prospective cohort study**

|                                 |                                                                                                |
|---------------------------------|------------------------------------------------------------------------------------------------|
| Journal:                        | <i>BMJ Open</i>                                                                                |
| Manuscript ID:                  | bmjopen-2011-000279.R1                                                                         |
| Article Type:                   | Research                                                                                       |
| Date Submitted by the Author:   | 01-Nov-2011                                                                                    |
| Complete List of Authors:       | Holtermann, Andreas<br>Mortensen, Ole<br>Søgaard, Karen<br>Gyntelberg, Finn<br>Suadicani, Poul |
| <b>Primary Subject Heading</b>: | Occupational & environmental medicine                                                          |
| Secondary Subject Heading:      | Epidemiology, Occupational & environmental medicine                                            |
| Keywords:                       | Ischaemic heart disease < CARDIOLOGY, EPIDEMIOLOGY, OCCUPATIONAL & INDUSTRIAL MEDICINE         |
|                                 |                                                                                                |

SCHOLARONE™  
Manuscripts

1 STROBE Statement—Checklist of items that should be included in reports of *cohort studies*

|                           | Item No | Recommendation              |
|---------------------------|---------|-----------------------------|
| <b>Title and abstract</b> | 1       | Page 1                      |
|                           |         | Page 2                      |
| <b>Introduction</b>       |         |                             |
| Background/rationale      | 2       | Page 3                      |
| Objectives                | 3       | Page 3                      |
| <b>Methods</b>            |         |                             |
| Study design              | 4       | Page 4 and 7                |
| Setting                   | 5       | Page 4                      |
| Participants              | 6       | Page 4                      |
| Variables                 | 7       | Page 4, 5 and 6             |
| Data sources/ measurement | 8       | Page 4, 5 and 6             |
| Bias                      | 9       | Page 7                      |
| Study size                | 10      | Page 4 and 7                |
| Quantitative variables    | 11      | Page 4, 5 and 6             |
| Statistical methods       | 12      | Page 7                      |
|                           |         | Page 7                      |
| <b>Results</b>            |         |                             |
| Participants              | 13      | Page 8                      |
|                           |         | Page 8                      |
| Descriptive data          | 14      | Page 8                      |
|                           |         | Page 8                      |
|                           |         | Page 8                      |
| Outcome data              | 15      | Page 8 and table 1-5        |
| Main results              | 16      | Table 1-5                   |
|                           |         | Page 8 and 9                |
|                           |         | Table 1-5                   |
| Other analyses            | 17      | No other analyses were done |
| <b>Discussion</b>         |         |                             |
| Key results               | 18      | Page 9                      |
| Limitations               | 19      | Page 11                     |
| Interpretation            | 20      | Page 10 and 11              |
| Generalisability          | 21      | Page 10 and 11              |
| <b>Other information</b>  |         |                             |
| Funding                   | 22      | Page 19                     |

54  
55  
56  
57  
58  
59  
60



1  
2  
3  
4 MS.ID:BMJOPEN-2011-000279

5 MS.TITLE: Risk factors for ischaemic heart disease mortality among men with different  
6 occupational physical demands. A 30-year prospective cohort study.  
7  
8  
9

10  
11  
12 Dear Managing Editor, BMJ Open, Richard Sands  
13

14  
15  
16 Thank you for the clear and constructive comments from the reviewers to our paper. We have  
17 revised the paper taking into account all suggestions to the extent possible. Moreover, we have  
18 modified the abstract in accordance with the new guidelines.  
19

20  
21  
22 How we addressed the points made by the reviewers appears below. The changes performed in the  
23 manuscript are marked with MS Word “track changes”.  
24  
25

26  
27 **Ad reviewer Alex Burdorf.**  
28

29  
30 We would like to thank you for the positive and constructive comments, improving our paper.  
31  
32

33  
34 Comment:

35 - Overall, a nice paper with some suggestions for improvements.  
36  
37 - I think the authors should consider an analysis with an interaction term. But..this is my preference,  
38 but may be not of the authors.  
39  
40

41  
42 Response:

43  
44 In previous papers from the Copenhagen male Study, which are referred to in the present paper,  
45 using the same baseline, cohort, and duration of follow-up, we addressed the interaction of  
46 occupational physical activity and leisure time physical activity as a predictor of IHD and all-cause  
47 mortality, and also the interaction of occupational physical activity and physical fitness (VO<sub>2</sub>max).  
48  
49 As described, the purpose of the present paper was to address in a much broader sense if established  
50 and potential risk factors for IHD mortality might differ between groups with different occupational  
51 physical work demands since, due to the load on the cardiovascular system induced by these  
52 demands, this may have influenced their vulnerability to risk factors. In the context of the present  
53  
54  
55  
56  
57  
58  
59  
60

1  
2  
3  
4 paper, interaction analyses would thus be either post hoc or superfluous, so we prefer to maintain  
5 the analysis strategy we have already applied.  
6  
7

8  
9 Comment:

10 1. The interesting observation that physical load and physical activity/fitness seem to interact to  
11 some extent was reported earlier, e.g. Russo OEM 2006 and a related commentary with other  
12 references. I think the authors could draw attention to the observation that PA (preventive factor) is  
13 something else than physical load (risk factor), and the current work presents some explanation for  
14 this.  
15  
16  
17  
18

19 Response:

20 We agree. This aspect is now included in the discussion section.  
21  
22  
23

24 Comment:

25 2. The physical work demands are not defined in the methods with sufficient details, please present  
26 more information  
27  
28

29 Response:

30 This is now explicitly described in the method section  
31  
32  
33

34 Comment:

35 3. The Cox regression presents HR, which may be interpreted as a proxy for RR, but the results  
36 should be presented as HR, since that is the measure of association in the analysis.  
37  
38

39 Response:

40 We agree with the reviewer that HR is a measure of relative risk. This is already briefly addressed  
41 in the Statistical analysis section, and in presentation of the results in the tables we present these as  
42 HR.  
43  
44  
45

46  
47 Comment:

48 4. The authors should consider a formal analysis of interaction, which could be presented in a single  
49 table, instead of the current stratification. The slight disadvantage with the current approach is that  
50 adjustment is done for the same variable but with another distribution, since essentially we have 3  
51 different populations with different size, which may complicate the picture of relevant (i.e. not only  
52 significant) variables.  
53  
54  
55  
56  
57  
58  
59  
60

1  
2  
3  
4 Response:

5 Please see our previous response to your comment concerning choice of analysis strategy.  
6  
7

8  
9 Comment:

10 5. The statement that "Surprisingly, among men with moderate physical work demands, but not  
11 among others, those who reported exposure to regular psychological work pressure" may be partly  
12 due to the suggestion in remark 4.  
13  
14

15 Response:

16 We find it unlikely that data manipulation would contribute to answer the observation and prefer to  
17 keep the expression used.  
18  
19

20  
21 Comment:

22 6. In the discussion the authors could pay attention to the distribution of men with good physical  
23 fitness cq PA over the 3 levels of physical work demands. This gives some input into the interesting  
24 results that physically demanding jobs will certainly not lead to physically healthy persons.  
25  
26  
27

28 Response:

29 This important aspect is now described in the discussion section.  
30  
31  
32

33 Comment:

34 7. Is there any information on change of job during the -70s and -80s, since it may very well be that  
35 a single measure in 1970 will be a good proxy for the next 20 years and, thus, the statement on  
36 misclassification on exposure could be substantiated.  
37  
38  
39

40 Response:

41 Information on job title was available only from the first baseline in the cohort, i.e. 1970-71.  
42  
43  
44

45 \*\*\*\*\*

46  
47 **Ad reviewer Marco M Ferrario**

48  
49 We would like to thank you for the positive and constructive comments, improving the paper.  
50  
51

52 Comment:

53 The study question is not clear. Please explain it better.  
54  
55  
56  
57  
58  
59  
60

1  
2  
3  
4 Response:

5 We see your point. The study question and hypothesis are now clarified in the abstract and  
6 introduction sections.  
7  
8

9  
10  
11 Comment:

12 Physical fitness. Add "maximum" to "The load chosen..". In addition: are you sure of the three step  
13 levels? Are not too high?  
14

15  
16 Response:

17 "maximum" is now included in the sentence.

18 The three steps were applied in only a very few cases.  
19  
20

21  
22 Comment:

23 Alcohol consumption in the weekends not given. Why?  
24

25  
26 Response:

27 Unfortunately, we don't have specific information about alcohol consumption during the weekends.  
28  
29

30  
31 Comment:

32 Why lipid measurements are not included. Which might be the effect(s) of not having them.  
33

34 Response:

35 Unfortunately, lipid measurements are not available at baseline. Lipids could therefore be a  
36 potential confounder/risk factor in this study. However, the direction of its effect is uncertain. This  
37 is now included as a methodological aspect in the discussion section.  
38  
39  
40  
41

42 Comment:

43 Blood pressure: only one measurement? This should be discussed base on the Results showing a  
44 strong effect of BP levels, both of systolic and diastolic BP.  
45  
46

47 Response:

48 We have added a brief statement in the results section addressing table 1 that despite the fact that  
49 blood pressure was measured only once, the predictive strength of systolic as well as diastolic was  
50 strong.  
51  
52  
53  
54  
55  
56  
57  
58  
59  
60

1  
2  
3  
4 Comment:

5 I suggest to include in Table 1 in addition to the listed independent variables physical work demand,  
6 which is the stratifying variable for the following tables. I do not think it is meaningful to add  
7 models adjusting also for the independent variables.  
8

9  
10  
11 Response:

12 The idea of the paper is to challenge the relative importance of a number of risk factors for IHD  
13 mortality among men with different occupational physical work demands. Thus, table 1 presents the  
14 role of these factors, when they “stand alone”, *i.e.* are adjusted for age only, and in various other  
15 models taking into account factors associated with these single items. We believe that keeping the  
16 table as it is will uphold the flow of the presentation from a logical narrative point of view.  
17  
18  
19

20  
21  
22 Comment:

23 Not clear why social class is added to the last model only, in all tables.  
24

25  
26 Response:

27 Social class is included in the last model only to explicitly show the independent results (after  
28 adjusting for the potential confounders) with and without adjustment for social class. This is chosen  
29 because social class may be considered an “over-adjustment”, since social class is strongly  
30 associated with physical work demands.  
31  
32  
33

34  
35  
36 Comment:

37 The worker healthy effect bias may play some role? Please add some considerations in Discussion.  
38

39 Response:

40 Yes, the healthy worker effect may impose a significant bias of the result. This is now considered in  
41 the discussion section.  
42  
43  
44

45  
46 Comment:

47 Conclusions are too general, please be more specific.  
48

49 Response:

50 We want to be careful with providing very specific conclusions. However, we have specified the  
51 conclusions in the abstract and discussion sections.  
52  
53  
54  
55  
56  
57  
58  
59  
60

1  
2  
3  
4  
5  
6 **Risk factors for ischaemic heart disease mortality among men with different oc-**  
7 **cupational physical demands. A 30-year prospective cohort study**  
8  
9

10  
11  
12  
13 Andreas Holtermann<sup>b</sup>, Ole Steen Mortensen<sup>a,b</sup>,  
14 Karen Søgaard<sup>c</sup>, Finn Gyntelberg<sup>a</sup>, Poul Suadicani<sup>a</sup>  
15  
16  
17  
18  
19

20 <sup>a</sup>The Copenhagen Male Study  
21 Epidemiological Research Unit  
22 Dept. of Occupational and  
23 Environmental Medicine  
24 Bispebjerg University Hospital  
25  
26 DK-2400 Copenhagen NV Denmark  
27  
28  
29  
30

31 <sup>b</sup>National Research Centre for the Working Environment  
32 Lersø Park Allé 105  
33  
34 DK-2100 Copenhagen, Denmark  
35  
36  
37

38 <sup>c</sup>Institute of Sport Science and Clinical Biomechanics  
39 University of Southern Denmark  
40 Campusvej 55, DK-5230 Odense M, Denmark  
41  
42  
43  
44

45 Correspondence to Andreas Holtermann  
46 National Research Centre for the Working Environment  
47 Lersø Parkallé 105, 2100 Copenhagen Ø, Denmark  
48  
49 E-mail: [aho@nrcwe.dk](mailto:aho@nrcwe.dk)  
50  
51 Telephone number: +45 39165200  
52  
53 Fax number: +45 39165201  
54  
55

56  
57 Keywords: Cardiovascular health; occupational health; cardiorespiratory fitness; physical activity  
58

59 Word count: 2597  
60

**ABSTRACT**

**Objectives** Men with high physical work demands have elevated cardiovascular strain, which may lead to enhanced atherosclerosis. Theoretically, the impact of risk factors for ischaemic heart disease (IHD) may thus depend on physical work demands. We investigated this hypothesis.

**Design** Prospective 30-year follow-up

**Setting** The Copenhagen Male Study

**Participants** 5,249 gainfully employed men aged 40-59 years; 311 men with cardiovascular disease/diabetes were excluded.

**Primary and secondary outcome measures** IHD and all-cause mortality

**Results** 579 men (11.8%) died due to IHD and 2,628 (53.7%) from all-cause mortality. Similarities and differences in risk predictors were found between men with low (n=1,219), medium (n=2,636), and high (n=846) physical work demands. After control for potential confounders, high physical fitness conferred a reduced risk of IHD mortality only among men with high physical work demands (HR:0.48, CI95%:0.24-0.96), a moderate/high level of leisure time physical activity was associated with reduced risk of IHD mortality only among men with moderate and high physical work demands. High systolic blood pressure and smoking were risk factors in all groups. Similar, but less pronounced differences in risk factors for all-cause mortality between groups were found.

**Conclusion** The risk factors for IHD and all-cause mortality, low physical fitness and low leisure time physical activity, are not identical for men with different physical work demands. Preventive initiatives for IHD should be tailored to the physical work demands.

## ARTICLE SUMMARY

### Article focus

- Men with high physical work demands have elevated cardiovascular strain and risk of ischaemic heart disease (IHD)
- Unknown if established risk factors for IHD impose divergent risk for IHD mortality among men with different levels of occupational physical activity

### Key messages

- Risk factors for IHD and all-cause mortality are not identical for men with different physical work demands
- Low physical fitness and leisure time physical activity particularly increase the risk of IHD mortality among men with high physical work demands
- Preventive initiatives for IHD ought not to be general, but tailored to the physical work demands of employees

### Strengths and limitations

Study strengths are the 30-years follow-up on objective outcomes, inclusion of several objectively measured risk factors for IHD and mortality, and exclusion of workers with pre-existing cardiovascular disease at baseline. Study limitations are that physical work demands was based on self-assessment, and lacking repeated measures of exposure during the relatively long follow-up period

## INTRODUCTION



1  
2 Cardiovascular diseases are leading causes of death worldwide and account for about 30% of all  
3  
4 deaths.[1] Occupational factors may be responsible for up to about 20% of all ischaemic heart dis-  
5  
6 ease (IHD) incidents.[2] Exposure to high physical work demands is an independent risk factor for  
7  
8 IHD mortality and carotid arterial atherosclerosis.[3-5]  
9

10  
11  
12 Physiologically, dynamic or static occupational physical activity several hours per day may induce a  
13  
14 prolonged intravascular turbulence and increased wall shear stress,[6] inducing inflammatory pro-  
15  
16 cesses in the arterial walls that may potentially lead to atherosclerosis.[5] These acute adverse ef-  
17  
18 fects of occupational physical activity may be modified by leisure time physical activity known to  
19  
20 promote cardio-respiratory physical fitness [7] and reduce heart rate and blood pressure during daily  
21  
22 activities.[8] A higher cardio-respiratory physical fitness and lower heart rate provides a longer pe-  
23  
24 riod in the diastolic phase of the cardiac circle, causing better myocardium perfusion and a favoura-  
25  
26 ble intravascular turbulence and wall shear stress, reducing risk for inflammation and atherosclero-  
27  
28 sis.[5, 6] Previous results from the Copenhagen Male Study support this rationale [4] showing that  
29  
30 high physical work demands confer an increased risk of IHD mortality among men with a low phys-  
31  
32 ical fitness, but not among men with high physical fitness.  
33  
34  
35  
36  
37  
38  
39

40 The theoretical implication is that those exposed to high physical demands and cardiovascular strain  
41  
42 at work might be particularly vulnerable when exposed to other established risk factors for IHD  
43  
44 mortality like smoking, high blood pressure and low leisure time physical activity. Therefore, these  
45  
46 risk factors for IHD and all-cause mortality may impose a divergent impact on people with different  
47  
48 physical activity levels at work. The hypothesis of the study is that established hazards for IHD im-  
49  
50 pose a divergent risk for IHD mortality among men with different level of occupational physical  
51  
52 activity. This hypothesis has not previously been addressed in the scientific medical literature alt-  
53  
54 hough, if supported, it may have important public health implications and be relevant in an occupa-  
55  
56 tional health context.  
57  
58  
59  
60

## MATERIALS AND METHODS

### Study design and population

The Copenhagen Male Study was established in 1970–1971. At 14 companies in Copenhagen, covering the railway, public road construction, military, post, telephone, customs, national bank, and the medical industry, all men aged 40–59 years were invited; 5,249 men, 87% of potential participants, agreed to participate.[9, 10]

The examination consisted of a questionnaire, a short interview, and a clinical examination including measurements of height, weight and blood pressure, and measurement of cardiorespiratory (physical) fitness following a bicycle ergometer test. Indirect measurement of physical fitness (VO<sub>2</sub>Max) was performed with a bicycle ergometer. Thirty-five men with orthopaedic problems unable to perform the bicycle test were excluded from the study.

From the questionnaire, information about working conditions including perceived psychosocial pressure during work, lifestyle, and general health, including history of myocardial infarction, angina pectoris, and intermittent claudication was obtained. The information given in the questionnaire was clarified with each subject in the ensuing interview by one of the authors (FG). Details on the questionnaire have already been published [11] and are elaborated in more detail below.

### Weekly work hours

Participants reported their weekly number of work hours in categories: 1) < 30, 2) 30-35, 3) 36-40, 4) 41-45, and 5) > 45. The distributions of answers in these groups were: 0.2%, 0.6%, 12.1%, 68.6%, and 18.6%, respectively, among men eligible for study. Due to the small number of men working less than 36 hours/week, the first three groups were pooled.

## Markers of psychosocial pressure at work and leisure

“Are you under psychological pressure when performing your work?” Answer options were: “rarely” and “regularly”.

“Do you take sedatives or sleep medicine?” Answer options were: “rarely”, “regularly” and “never”.

“Are you under psychological pressure in your leisure time?” Answer options were: “rarely” and “regularly”.

## Physical work demands

Physical activity at work was estimated using the following questions:

Which description most precisely covers your pattern of physical activity at work?

1. You are mainly sedentary and do not walk much around at your workplace. *E.g.* desk work, work including assembling of minor parts.
2. You walk around quite a bit at your workplace but do not have to carry heavy items. *E.g.* light industrial work, non-sedentary office work, inspection and the like.
3. Most of the time you walk, and you often have to walk up stairs and lift various items. Examples include mail delivery and construction work.
4. You have heavy physical work. You carry heavy burdens and carry out physically strenuous work. *E.g.* work including digging and shoveling.

In the analyses group 1 is referred to as Low and group 2 as moderate; since only 2.4% belonged to group 4, groups 3 and 4 were pooled and are referred to as high.

In addition, the following question on physical strenuous work was used:

“Do you perform strenuous work (work resulting in sweating)?” Answer options were: “often”, “occasionally” and “seldom or never”, and coded as 1= seldom or never, 2= occasionally and 3= often.

1 In order to discriminate between men with presence or absence of physically demanding work, we  
2 constructed an additional variable based on the two described above. With respect to physical activ-  
3 ity at work, groups were coded: low=1, moderate=2 and high=3. With respect to physical strenuous  
4 work, groups were coded: often=3, occasionally=2, and seldom or never=1. Summing up the two  
5 gave values from 2 to 6. A low combined score of 2 was defined as low physical work demands, a  
6 score of 3 or 4 was defined as moderate physical work demands, and a score of 5 or 6 was defined  
7 as high physical work demands.  
8  
9  
10  
11  
12  
13  
14  
15  
16  
17  
18  
19

### 20 **Physical fitness**

21 Heart rate was measured during submaximal bicycle work in a steady state with the aid of a stop-  
22 watch and stethoscope. The loads used were 100, 150 and 200 W. One, two or in a few cases three  
23 different loads were used. The maximum load chosen in each case was based on weight and age of  
24 the person or heart rate during the first minute of the test, and the estimation of VO<sub>2</sub>Max was ac-  
25 complished with the aid of Åstrand's nomogram.[12] The correlation between directly and indirect-  
26 ly measured VO<sub>2</sub>Max is high. The method used has previously been described in detail.[9]  
27  
28  
29  
30  
31  
32  
33  
34  
35  
36  
37

### 38 **Physical activity in leisure time**

39 Which description most precisely covers your pattern of physical activity in leisure time?  
40

- 41 1. You are mainly sedentary *e.g.* you read, watch television, go to the pictures. In general you  
42 spend most of your leisure time performing sedentary tasks.  
43
- 44 2. You go for a walk, use your bicycle a little or perform activity for at least 4 hours/week. *e.g.*  
45 light gardening, leisure-time building activity, table tennis and bowling.  
46
- 47 3. You are an active athlete, run, play tennis or badminton for at least 3 hours/week. If you fre-  
48 quently perform heavy gardening, you also belong to this group.  
49
- 50 4. You take part in competitive sports, swim, play European football, handball or run long dis-  
51 tances regularly *i.e.* several times/week.  
52  
53  
54  
55  
56  
57  
58  
59  
60

1  
2 In the analyses group 1 is referred to as Low and group 2 as Moderate; since only 0.4% belonged to  
3  
4 group 4, groups 3 and 4 were pooled and are referred to as High.  
5  
6  
7

### 8 *Lifestyle factors*

#### 9 **Smoking**

10  
11 The men reported if they smoked currently, previously or had never smoked.  
12  
13

#### 14 **Alcohol**

15  
16 Participants reported their daily average alcohol consumption as the number of alcoholic beverages  
17  
18 consumed per day in categories: 0, 1-2, 3-5, 6-10, and > 10.  
19  
20  
21

### 22 *Clinical and health related factors*

#### 23 **Body Mass Index (BMI)**

24  
25 Based on height and weight measurements BMI was calculated as  $\text{kg/m}^2$ .  
26  
27

#### 28 **Blood pressure**

29  
30 Measurements of blood pressure were carried out with the subject seated and after at least 5 min  
31  
32 rest. A 12-cm wide, 26-cm-long cuff was firmly and evenly applied to the subject's right upper arm  
33  
34 with the lower edge of the cuff placed 2 cm antecubitally. Diastolic blood pressure was recorded at  
35  
36 the point where the Korotkoff sounds disappeared (phase 5).  
37  
38  
39

#### 40 **Hypertension treatment**

41  
42 The participants were asked if they received treatment due to hypertension from their physician or  
43  
44 elsewhere. Answer options were yes and no.  
45  
46  
47

#### 48 **Diabetes treatment**

49  
50 The participants were asked if they received treatment due to diabetes mellitus from their physician  
51  
52 or elsewhere. Whether their diabetes was type 1 or 2 was not recorded, and neither was their actual  
53  
54 medication. Answer options were yes and no.  
55  
56

#### 57 *Social class*

1 The men were divided into five social classes according to a system originally elaborated by Svalas-  
2 toga, later adjusted by Hansen.[13, 14] This classification system is based on education level, and  
3  
4  
5  
6 job position in terms of number of subordinates. Typical jobs in the study cohort were, in social  
7  
8 class I: officer, civil engineer, office executive, head of department; social class II: head clerk, engi-  
9  
10 neer; social class III: engine driver, train guard; social class IV: machine fitter in a telephone com-  
11  
12 pany; social class V: unskilled laborer, mechanic, driver.  
13

### 14 15 16 17 **Eligibility**

18  
19 In addition to the 35 men unable to carry out the bicycle test, men with a history of myocardial in-  
20  
21 farction (n=74), angina pectoris (n=165) or intermittent claudication (n=105) and 37 men receiving  
22  
23 treatment due to diabetes were excluded from the prospective study. In total this latter group com-  
24  
25 prised 311 men and 9 men with missing answers leaving 4,906 men for the incidence study. With  
26  
27 respect to all variables included, missing values ranged from 0 to 2.7%.  
28  
29

### 30 31 32 33 **End-points**

34  
35 Information on death diagnoses within the period 1970-71 to end of 2001 was obtained from offi-  
36  
37 cial national registers. The ischaemic heart disease mortality diagnoses used encompassed ICD-8  
38  
39 codes : 410-14, and (from 1994) ICD-10: I20-I25.  
40  
41

### 42 43 44 **Statistical analyses**

45  
46 Basic statistical analyses, including Chi-squared analysis (likelihood ratio), unpaired (Student's) t  
47  
48 test, and regression analyses, were performed. Relative risks were estimated by  $\exp(\beta)$ , where  $\beta$  is the  
49  
50 hazard coefficient for the variable of interest in a Cox's proportional hazards regression model with the  
51  
52 maximum likelihood ratio method. Assumptions regarding the use of Cox's proportional hazards were  
53  
54 met by inspection of the log minus log function at the covariate mean. A two-sided probability value of  
55  
56  $p \leq 0.05$  was a priori taken as significant.  
57  
58  
59  
60

## RESULTS

In the eligible study population of male employees who had completed the ergometer test and were without a history of myocardial infarction, angina pectoris, intermittent claudication or diabetes, 579 died (11.8%) from IHD during the period 1970/1971 to 2001. During the same period, 2,628 (53.7%) died in total.

Table 1 shows the association between lifestyle and other potential predictors with risk of IHD mortality including the entire population eligible for study. Hazard ratios (95%CI) are presented for each factor following different adjustment criteria: control for age only, age plus lifestyle, age plus clinical factors, and, finally, a model including all available potential risk factors/confounders. In the final model controlling for all factors, significant risk factors of IHD mortality were age, smoking, low leisure time physical activity, high systolic and diastolic blood pressure, and low social class. Despite the fact that blood pressure was measured only once, the predictive strength of systolic as well as diastolic was strong.

Table 2 presents the results of a similar analysis including only men with low physical work demands. In the final, fully adjusted model, significant associations with risk of IHD mortality were found for age, alcohol consumption - with a lower risk among those consuming 1-2 beverages, systolic and diastolic blood pressure. Never smokers had half the risk of IHD mortality compared to current smokers, HR = 0.51(0.25-1.02).

Table 3 presents the association between lifestyle and other potential predictors and risk for IHD mortality among men with moderate physical work demands. In the final model, significant positive associations with risk of IHD mortality were found for age, smoking, low leisure time physical ac-

1 tivity, high systolic blood pressure, and low social class. Surprisingly, perceived psychological  
2 pressure at work conferred a lower risk of IHD mortality.  
3  
4

5  
6  
7  
8 Table 4 shows the association between lifestyle and other potential predictors and risk for IHD mor-  
9 tality among men with high physical work demands. In the final model, significant positive associa-  
10 tions with risk of IHD mortality were found for age, smoking, low leisure time physical activity,  
11 high systolic blood pressure and low physical fitness.  
12  
13  
14

15  
16  
17  
18 Among the total eligible study population, significant multi-adjusted (i.e. age, lifestyle, clinical fac-  
19 tors, psychosocial stress at work and leisure, number of work hours, and social class) positive asso-  
20 ciations with risk of all-cause mortality were found for smoking, alcohol consumption, low leisure  
21 time physical activity, high systolic and diastolic blood pressure, low physical fitness, and low so-  
22 cial class (data on all-cause mortality not shown). An inverse multi-adjusted association was found  
23 for number of weekly work hours and all-cause mortality. Among males with low physical work  
24 demands, multi-adjusted significant positive associations with risk of all-cause mortality were found  
25 for age, smoking, low leisure time physical activity, high systolic and diastolic blood pressure, and  
26 low social class. Among males with moderate physical work demands, significant multi-adjusted  
27 positive associations with risk of all-cause mortality were found for age, smoking, alcohol con-  
28 sumption, low leisure time physical activity, high systolic blood pressure, and low physical fitness.  
29 Among males with high physical work demands, significant multi-adjusted positive associations  
30 with risk of all-cause mortality were found for age, smoking, alcohol consumption, high diastolic  
31 blood pressure, low physical fitness, and low social class.  
32  
33  
34  
35  
36  
37  
38  
39  
40  
41  
42  
43  
44  
45  
46  
47  
48  
49  
50

## 51 52 53 **COMMENTS**

54  
55 The findings of this study support the hypothesis that risk factors for IHD and all-cause mortality  
56 have a divergent impact on people with different physical activity levels at work. However, the  
57  
58  
59  
60



1 well-established risk factors smoking and high blood pressure were strongly associated with IHD  
2 mortality risk whether physical work demands were low, moderate, or high. With respect to alcohol  
3 consumption, we confirmed the well-known U- or J-shaped relationship with cardiovascular mortal-  
4 ity risk,[15] with a lower risk among those with a moderate daily consumption. This relationship  
5 was consistent among those with low and moderate physical work demands, but absent among the  
6 group with the highest physical work demands.  
7  
8  
9  
10  
11  
12  
13

14 Surprisingly, among men with moderate physical work demands, but not among others, those who  
15 reported exposure to regular psychological work pressure had a lower risk of IHD mortality than  
16 those who did not. This lower risk could not be attributed to underlying risk factor characteristics of  
17 men with and without perceived psychological work pressure. A biologically plausible explanation  
18 for this observation will be speculative.  
19  
20  
21  
22  
23  
24  
25  
26  
27  
28  
29

30 Low physical activity in leisure time was a statistically significant risk factor among those with a  
31 moderate or high level of physical work demands. Among those with low physical work demands,  
32 the association was weaker and did not reach statistical significance. Only among men with high  
33 physical work demands, those with highest level of physical fitness had a significantly lower risk of  
34 IHD mortality compared to those with a low fitness level. This finding supports previous observa-  
35 tions that physical work demands have may generally have the opposite effect on cardiovascular  
36 health, general health and physical function than that of leisure time physical activity. [3, 16, 17]  
37  
38  
39  
40  
41  
42  
43  
44  
45  
46  
47

48 Physical fitness is a well established predictor of cardiovascular disease and mortality.[7, 18-20] In  
49 our study, considerable differences were found between men with different occupational physical  
50 demands in the predictive role of physical fitness for both IHD and all-cause mortality (data not  
51 shown). High physical fitness was found to reduce the risk for IHD mortality among men with high  
52 physical work demands with as much as 52%, but only modestly (22%) and non-significantly (9%)  
53  
54  
55  
56  
57  
58  
59  
60

1 among men with low and moderate physical work demands, respectively. Among men with moder-  
2 ate physical work demands, a high physical fitness was though associated with reduced all-cause  
3 mortality risk (38%). These findings add further support to our previous observation that men with  
4 high physical work demands and high physical fitness do not have an increased risk of IHD mortali-  
5 ty in contrast to men with high physical work demands and low physical fitness.[4] The results also  
6 show that those with high physical work demands do not have a higher level of physical fitness  
7 compared to those with low physical work demands, indicating that high physical work demands do  
8 not lead to improvements in physical fitness.  
9

10 Also the inverse association between leisure time physical activity and risk of IHD mortality was  
11 most pronounced among men with moderate and high occupational physical activity. High or medi-  
12 um leisure time physical activity reduced the risk of IHD mortality among men with moderate and  
13 high occupational physical demands, with 63% and 44%, respectively. These findings indicate that  
14 it is particularly important to be physically active during leisure time when having moderate or high  
15 occupational physical activity for preventing IHD mortality.[3] The particular importance of leisure  
16 time physical activity and high physical fitness among men with high physical work demands may  
17 be due to a lower heart rate during daily activities and a subsequent improvement of myocardial  
18 perfusion, and a lower intravascular turbulence and wall shear stress among these workers with high  
19 cardiovascular strain several hours per day.  
20

21 A methodological aspect of this study is that the information regarding physical work demands was  
22 based on self-assessment, which invariably entails some degree of misclassification.[21] However,  
23 no technical equipment for measuring daily physical activity at work and in leisure was available in  
24 1970, at least not in Denmark. In addition, the lack of continuous exposure data and repeated  
25 measures of exposure during the relatively long follow-up period may have contributed to misclas-  
26 sification of exposure. The study population of the Copenhagen Male Study is urban Danish male  
27  
28  
29  
30  
31  
32  
33  
34  
35  
36  
37  
38  
39  
40  
41  
42  
43  
44  
45  
46  
47  
48  
49  
50  
51  
52  
53  
54  
55  
56  
57  
58  
59  
60

workers between 40-59 years of age in 1970-1971. It is unknown whether the findings of this study are relevant also for females, younger workers, self-employed or workers from other (e.g. rural) communities and nationalities. The healthy worker effect may be particularly strong among the men with high physical work demands, and therefore reduced differences in risk estimates between the groups of physical work demands. Information about lipids was not available, which may have induced some confounding effect on the results. Moreover, the workers with pre-existing cardiovascular disease were excluded from this study.

In conclusion, well-established risk factors like smoking and high blood pressure were strongly associated with IHD mortality risk among all groups of physical work demands. However, other risk factors for IHD and all-cause mortality were not identical for men with different physical work demands. Low physical fitness and low leisure time physical activity was observed to only increase the risk for IHD mortality among men with high physical work demands. Preventive initiatives for IHD ought to be tailored to the physical work demands.

**Table 1. All men eligible for the incidence study. Lifestyle and other predictors of IHD mortality (n = 579, 11.8%) during the 30-year follow-up 1970/71 to 2001. Statistically significant results are highlighted (bold).**

|     | Cumulative incidence, % | Hazard Ratio <sup>c</sup> | Hazard Ratio <sup>d</sup> | Hazard Ratio <sup>e</sup> | Hazard Ratio <sup>f</sup> |
|-----|-------------------------|---------------------------|---------------------------|---------------------------|---------------------------|
| Age |                         |                           |                           |                           |                           |

|                                        |       |                        |                        |                        |                        |
|----------------------------------------|-------|------------------------|------------------------|------------------------|------------------------|
| Youngest half (max 48 y), n=2,436      | 7.6%  | na                     | 1 <sup>a</sup>         | 1 <sup>a</sup>         | 1 <sup>a</sup>         |
| Oldest half (> 48 y), n=2,470          | 16.0% |                        | <b>2.72(2.27-3.26)</b> | <b>2.33(1.95-2.79)</b> | <b>2.42(2.01-2.92)</b> |
| Smoking                                |       |                        |                        |                        |                        |
| Current, n=3,522                       | 12.7% | 1 <sup>a</sup>         | 1 <sup>a</sup>         | 1 <sup>a</sup>         | 1 <sup>a</sup>         |
| Previous, n=937                        | 9.9%  | <b>0.66(0.53-0.82)</b> | <b>0.68(0.54-0.86)</b> | <b>0.57(0.45-0.71)</b> | <b>0.60(0.47-0.75)</b> |
| Never, n=446                           | 9.0%  | <b>0.59(0.43-0.81)</b> | <b>0.63(0.44-0.86)</b> | <b>0.50(0.36-0.69)</b> | <b>0.51(0.36-0.71)</b> |
| Alcohol, beverages/d                   |       |                        |                        |                        |                        |
| 0, n=1,658                             | 12.6% | 1 <sup>a</sup>         | 1 <sup>a</sup>         | 1 <sup>a</sup>         | 1 <sup>a</sup>         |
| 1-2, n=2,315                           | 10.6% | 0.84(0.70-1.01)        | <b>0.82(0.68-0.99)</b> | <b>0.84(0.69-1.00)</b> | 0.84(0.69-1.02)        |
| 3-5, n=764                             | 13.1% | 1.18(0.93-1.49)        | 1.06(0.83-1.36)        | 1.07(0.84-1.36)        | 0.87(0.68-1.13)        |
| 6+, n=151                              | 16.6% | 1.97(1.30-2.99)        | 1.73(1.13-2.65)        | 1.63(1.06-2.50)        | 1.14(0.73-1.77)        |
| Leisure time physical activity         |       |                        |                        |                        |                        |
| Low, n=798                             | 15.4% | 1 <sup>a</sup>         | 1 <sup>a</sup>         | 1 <sup>a</sup>         | 1 <sup>a</sup>         |
| Medium, n=3,478                        | 11.3% | <b>0.68(0.56-0.84)</b> | <b>0.71(0.58-0.87)</b> | <b>0.70(0.57-0.86)</b> | <b>0.73(0.59-0.89)</b> |
| High, n=498                            | 8.1%  | <b>0.51(0.35-0.73)</b> | <b>0.54(0.38-0.78)</b> | <b>0.57(0.40-0.82)</b> | <b>0.62(0.43-0.90)</b> |
| BMI                                    |       |                        |                        |                        |                        |
| - 25, n=2,358                          | 10.1% | 1 <sup>a</sup>         | 1 <sup>a</sup>         | 1 <sup>a</sup>         | 1 <sup>a</sup>         |
| > 25 – 28, n=1,710                     | 11.9% | 1.11(0.92-1.34)        | 1.14(0.94-1.38)        | 0.97(0.80-1.18)        | 0.96(0.79-1.56)        |
| > 28, n=829                            | 16.7% | <b>1.66(1.34-2.04)</b> | <b>1.67(1.34-2.08)</b> | <b>1.25(1.0-1.56)</b>  | 1.23(0.97-1.56)        |
| Systolic BP, mm Hg                     |       |                        |                        |                        |                        |
| - 120, n=1,383                         | 6.4%  | 1 <sup>a</sup>         | 1 <sup>a</sup>         | 1 <sup>a</sup>         | 1 <sup>a</sup>         |
| > 120 – 150, n=2,869                   | 12.6% | <b>2.01(1.59-2.53)</b> | <b>2.09(1.65-2.66)</b> | <b>1.65(1.29-2.11)</b> | <b>1.80(1.40-2.34)</b> |
| > 150, n=650                           | 20.2% | <b>3.32(2.52-4.36)</b> | <b>3.54(2.67-4.70)</b> | <b>2.02(1.44-2.85)</b> | <b>2.42(1.72-3.41)</b> |
| Diastolic BP mm Hg                     |       |                        |                        |                        |                        |
| - 75, n=1,421                          | 8.3%  | 1 <sup>a</sup>         | 1 <sup>a</sup>         | 1 <sup>a</sup>         | 1 <sup>a</sup>         |
| >75-90, n=2,736                        | 11.4% | <b>1.38(1.11-1.70)</b> | <b>1.48(1.19-1.84)</b> | 1.16(0.93-1.45)        | 1.12(0.89-1.42)        |
| > 90, n=745                            | 20.0% | <b>2.79(2.12-3.44)</b> | <b>2.91(2.26-3.75)</b> | <b>1.66(1.21-2.27)</b> | <b>1.74(1.27-2.37)</b> |
| Hypertension <sup>b</sup>              |       |                        |                        |                        |                        |
| No, n=4,826                            | 11.6% | 1 <sup>a</sup>         | 1 <sup>a</sup>         | 1 <sup>a</sup>         | 1 <sup>a</sup>         |
| Yes, n=77                              | 27.3% | <b>2.41(1.56-3.73)</b> | <b>2.36(1.52-3.66)</b> | 1.38(0.87-2.17)        | 1.46(0.92-2.30)        |
| Physical fitness (VO <sub>2</sub> Max) |       |                        |                        |                        |                        |
| 15-26, n=882                           | 16.7% | 1 <sup>a</sup>         | 1 <sup>a</sup>         | 1 <sup>a</sup>         | 1 <sup>a</sup>         |
| 27-38, n=3,017                         | 11.5% | <b>0.74(0.61-0.90)</b> | <b>0.76(0.62-0.93)</b> | 0.88(0.71-1.07)        | 0.88(0.71-1.08)        |
| 39-78, n=1,007                         | 8.5%  | <b>0.56(0.43-0.73)</b> | <b>0.60(0.45-0.80)</b> | 0.77(0.57-1.02)        | 0.78(0.58-1.05)        |
| Psychological pressure at work         |       |                        |                        |                        |                        |
| No, n=3,834                            | 12.2% | 1 <sup>a</sup>         | 1 <sup>a</sup>         | 1 <sup>a</sup>         | 1 <sup>a</sup>         |
| Yes, n=1,060                           | 10.5% | 0.86(0.70-1.05)        | 0.86(0.70-1.07)        | 0.84(0.68-1.04)        | 0.88(0.70-1.10)        |
| Psychological pressure at leisure      |       |                        |                        |                        |                        |
| No, n=4,556                            | 11.8% | 1 <sup>a</sup>         | 1 <sup>a</sup>         | 1 <sup>a</sup>         | 1 <sup>a</sup>         |
| Yes, n=332                             | 12.7% | 1.11(0.81-1.53)        | 1.04(0.75-1.44)        | 1.17(0.85-1.60)        | 1.14(0.81-1.61)        |
| Work hours/week                        |       |                        |                        |                        |                        |
| < 40, n=628                            | 8.3%  | 1 <sup>a</sup>         | 1 <sup>a</sup>         | 1 <sup>a</sup>         | 1 <sup>a</sup>         |
| 40-45, n=3,366                         | 12.9% | <b>1.62(1.22-2.16)</b> | <b>1.57(1.17-2.10)</b> | <b>1.57(1.17-2.09)</b> | 1.25(0.92-1.69)        |
| > 45, n=911                            | 10.2% | 1.28(0.91-1.79)        | 1.33(0.94-1.88)        | 1.26(0.89-1.77)        | 1.12(0.79-1.59)        |
| Social class                           |       |                        |                        |                        |                        |
| High (I,II,III), n=2,196               | 9.1%  | 1 <sup>a</sup>         | 1 <sup>a</sup>         | 1 <sup>a</sup>         | 1 <sup>a</sup>         |
| Low (IV,V), n=2,688                    | 14.0% | <b>1.72(1.45-2.05)</b> | <b>1.61(1.35-1.93)</b> | <b>1.72(1.45-2.05)</b> | <b>1.48(1.22-1.79)</b> |

<sup>a</sup>: reference category

<sup>b</sup>: receives doctor's treatment due to hypertension

<sup>c</sup>: adjusted for age; <sup>d</sup>: adjusted for age + lifestyle (smoking, LTPA, alcohol); <sup>e</sup>: adjusted for age + clinical factors (BMI, blood pressure including treatment for, physical fitness); <sup>f</sup>: age + all other confounders/risk factors (lifestyle, clinical factors, psychosocial stress at work and leisure, number of work hours, and social class  
na: not applicable

**Table 2. Men with low physical work demands only, n= 1,219. Lifestyle and other predictors of IHD mortality (n = 118, 9.7%) during the 30-year follow-up 1970/71 to 2001. Statistically significant results are highlighted (bold).**

|     | Cumulative incidence, % | Hazard Ratio <sup>c</sup> | Hazard Ratio <sup>d</sup> | Hazard Ratio <sup>e</sup> | Hazard Ratio <sup>f</sup> |
|-----|-------------------------|---------------------------|---------------------------|---------------------------|---------------------------|
| Age |                         |                           |                           |                           |                           |

|                                        |       |                        |                        |                        |                        |
|----------------------------------------|-------|------------------------|------------------------|------------------------|------------------------|
| Youngest half (max 48 y), n=602        | 7.5%  | na                     | 1 <sup>a</sup>         | 1 <sup>a</sup>         | 1 <sup>a</sup>         |
| Oldest half (> 48 y), n=617            | 11.9% |                        | <b>1.90(1.31-2.76)</b> | <b>1.72(1.17-2.52)</b> | <b>1.75(1.19-2.58)</b> |
| Smoking                                |       |                        |                        |                        |                        |
| Current, n=808                         | 9.5%  | 1 <sup>a</sup>         | 1 <sup>a</sup>         | 1 <sup>a</sup>         | 1 <sup>a</sup>         |
| Previous, n=275                        | 11.7% | 1.12(0.74-1.69)        | 1.07(0.71-1.62)        | 1.03(0.68-1.56)        | 0.96(0.63-1.47)        |
| Never, n=135                           | 7.4%  | 0.67(0.35-1.30)        | 0.58(0.30-1.14)        | 0.56(0.29-1.10)        | 0.51(0.25-1.02)        |
| Alcohol, beverages/d                   |       |                        |                        |                        |                        |
| 0, n=478                               | 12.0% | 1 <sup>a</sup>         | 1 <sup>a</sup>         | 1 <sup>a</sup>         | 1 <sup>a</sup>         |
| 1-2, n=617                             | 7.5%  | <b>0.59(0.40-0.88)</b> | <b>0.58(0.40-0.86)</b> | <b>0.56(0.38-0.83)</b> | <b>0.59(0.40-0.88)</b> |
| 3-5, n=110                             | 13.6% | 1.26(0.72-2.23)        | 1.15(0.65-2.05)        | 1.08(0.60-1.91)        | 1.04(0.57-1.89)        |
| 6+, n=12                               | 0%    | na                     | na                     | na                     | na                     |
| Leisure time physical activity         |       |                        |                        |                        |                        |
| Low, n=227                             | 12.8% | 1 <sup>a</sup>         | 1 <sup>a</sup>         | 1 <sup>a</sup>         | 1 <sup>a</sup>         |
| Medium, n=859                          | 8.9%  | 0.66(0.43-1.02)        | <b>0.65(0.42-1.0)</b>  | 0.74(0.48-1.15)        | 0.74(0.47-1.15)        |
| High, n=130                            | 10.0% | 0.74(0.38-1.42)        | 0.70(0.36-1.35)        | 0.86(0.44-1.68)        | 0.76(0.38-1.53)        |
| BMI                                    |       |                        |                        |                        |                        |
| - 25, n=690                            | 8.2%  | 1 <sup>a</sup>         | 1 <sup>a</sup>         | 1 <sup>a</sup>         | 1 <sup>a</sup>         |
| > 25 – 28, n=381                       | 10.3% | 1.25(0.83-1.89)        | 1.30(0.86-1.96)        | 0.99(0.65-1.52)        | 1.04(0.68-1.60)        |
| > 28, n=146                            | 15.8% | <b>1.93(1.19-3.15)</b> | <b>1.79(1.09-2.92)</b> | 1.35(0.81-2.26)        | 1.17(0.69-1.98)        |
| Systolic BP, mm Hg                     |       |                        |                        |                        |                        |
| - 120, n=337                           | 4.5%  | 1 <sup>a</sup>         | 1 <sup>a</sup>         | 1 <sup>a</sup>         | 1 <sup>a</sup>         |
| > 120 – 150, n=720                     | 10.4% | <b>2.62(1.50-4.56)</b> | <b>2.46(1.41-4.29)</b> | <b>1.90(1.07-3.39)</b> | 1.62(0.89-2.95)        |
| > 150, n=160                           | 17.5% | <b>4.50(2.38-8.49)</b> | <b>4.55(2.41-8.60)</b> | 1.80(0.81-4.02)        | <b>2.34(1.10-4.99)</b> |
| Diastolic BP mm Hg                     |       |                        |                        |                        |                        |
| - 75, n=338                            | 4.5%  | 1 <sup>a</sup>         | 1 <sup>a</sup>         | 1 <sup>a</sup>         | 1 <sup>a</sup>         |
| >75-90, n=680                          | 9.9%  | <b>2.42(1.38-4.24)</b> | <b>2.43(1.39-4.27)</b> | <b>2.04(1.15-3.64)</b> | <b>1.94(1.07-3.53)</b> |
| > 90, n=199                            | 18.2% | <b>5.03(2.75-9.20)</b> | <b>4.90(2.67-9.0)</b>  | <b>2.93(1.40-6.12)</b> | <b>3.21(1.56-6.60)</b> |
| Hypertension <sup>b</sup>              |       |                        |                        |                        |                        |
| No, n=1196                             | 9.5%  | 1 <sup>a</sup>         | 1 <sup>a</sup>         | 1 <sup>a</sup>         | 1 <sup>a</sup>         |
| Yes, n=23                              | 21.7% | 1.85(0.75-4.56)        | 2.28(0.91-5.66)        | 0.92(0.36-2.33)        | 1.20(0.46-3.12)        |
| Physical fitness (VO <sub>2</sub> Max) |       |                        |                        |                        |                        |
| 15-26, n=238                           | 13.9% | 1 <sup>a</sup>         | 1 <sup>a</sup>         | 1 <sup>a</sup>         | 1 <sup>a</sup>         |
| 27-38, n=749                           | 8.7%  | <b>0.65(0.42-0.99)</b> | 0.67(0.44-1.03)        | 0.81(0.52-1.26)        | 0.82(0.53-1.27)        |
| 39-78, n=232                           | 8.7%  | 0.68(0.38-1.19)        | 0.70(0.39-1.25)        | 0.98(0.54-1.78)        | 0.91(0.49-1.66)        |
| Psychological pressure at work         |       |                        |                        |                        |                        |
| No, n=830                              | 9.6%  | 1 <sup>a</sup>         | 1 <sup>a</sup>         | 1 <sup>a</sup>         | 1 <sup>a</sup>         |
| Yes, n=386                             | 10.2% | 1.15(0.79-1.70)        | 1.11(0.76-1.64)        | 1.10(0.74-1.61)        | 1.02(0.68-1.55)        |
| Psychological pressure at leisure      |       |                        |                        |                        |                        |
| No, n=1,107                            | 9.6%  | 1 <sup>a</sup>         | 1 <sup>a</sup>         | 1 <sup>a</sup>         | 1 <sup>a</sup>         |
| Yes, n=109                             | 11.1% | 1.18(0.65-2.15)        | 1.09(0.59-2.01)        | 1.34(0.73-2.45)        | 1.35(0.71-2.58)        |
| Work hours/week                        |       |                        |                        |                        |                        |
| < 40, n=209                            | 8.1%  | 1 <sup>a</sup>         | 1 <sup>a</sup>         | 1 <sup>a</sup>         | 1 <sup>a</sup>         |
| 40-45, n=738                           | 10.9% | 1.35(0.80-2.29)        | 1.31(0.78-2.23)        | 1.26(0.74-2.13)        | 1.11(0.65-1.90)        |
| > 45, n=272                            | 7.7%  | 0.95(0.50-1.80)        | 0.93(0.48-1.77)        | 0.98(0.51-1.86)        | 0.84(0.43-1.63)        |
| Social class                           |       |                        |                        |                        |                        |
| High (I,II,III), n=946                 | 8.5%  | 1 <sup>a</sup>         | 1 <sup>a</sup>         | 1 <sup>a</sup>         | 1 <sup>a</sup>         |
| Low (IV,V), n=260                      | 13.8% | <b>1.69(1.14-2.51)</b> | <b>1.61(1.08-2.41)</b> | <b>1.69(1.13-2.53)</b> | 1.45(0.96-2.20)        |

<sup>a</sup>: reference category

<sup>b</sup>: receives doctor's treatment due to hypertension

<sup>c</sup>: adjusted for age; <sup>d</sup>: adjusted for age + lifestyle (smoking, LTPA, alcohol); <sup>e</sup>: adjusted for age + clinical factors (BMI, blood pressure including treatment for, physical fitness); <sup>f</sup>: age + all other confounders/risk factors (lifestyle, clinical factors, psychosocial stress at work and leisure, number of work hours, and social class

na: not applicable

**Table 3. Men with moderate physical work demands only, n= 2,636. Lifestyle and other predictors of IHD mortality (n = 312, 11.8%) during the 30-year follow-up 1970/71 to 2001. Statistically significant results are highlighted (bold).**

|                                        | Cumulative incidence, % | Hazard Ratio <sup>c</sup> | Hazard Ratio <sup>d</sup> | Hazard Ratio <sup>e</sup> | Hazard Ratio <sup>f</sup> |
|----------------------------------------|-------------------------|---------------------------|---------------------------|---------------------------|---------------------------|
| Age                                    |                         |                           |                           |                           |                           |
| Youngest half (max 48 y), n=1,316      | 7.2%                    | na                        | 1 <sup>a</sup>            | 1 <sup>a</sup>            | 1 <sup>a</sup>            |
| Oldest half (> 48 y), n=1,320          | 16.6%                   |                           | <b>2.98(2.33-3.81)</b>    | <b>2.69(2.10-3.45)</b>    | <b>2.74(2.13-3.52)</b>    |
| Smoking                                |                         |                           |                           |                           |                           |
| Current, n=1,901                       | 13.0%                   | 1 <sup>a</sup>            | 1 <sup>a</sup>            | 1 <sup>a</sup>            | 1 <sup>a</sup>            |
| Previous, n=502                        | 8.8%                    | <b>0.57(0.41-0.78)</b>    | <b>0.59(0.43-0.82)</b>    | <b>0.47(0.34-0.65)</b>    | <b>0.52(0.38-0.73)</b>    |
| Never, n=233                           | 9.0%                    | <b>0.57(0.37-0.89)</b>    | <b>0.60(0.39-0.95)</b>    | <b>0.52(0.33-0.81)</b>    | <b>0.53(0.33-0.83)</b>    |
| Alcohol, beverages/d                   |                         |                           |                           |                           |                           |
| 0, n=898                               | 13.1%                   | 1 <sup>a</sup>            | 1 <sup>a</sup>            | 1 <sup>a</sup>            | 1 <sup>a</sup>            |
| 1-2, n=1,250                           | 10.7%                   | 0.82(0.64-1.05)           | 0.83(0.64-1.06)           | 0.83(0.64-1.06)           | 0.84(0.65-1.09)           |
| 3-5, n=404                             | 11.7%                   | 1.00(0.71-1.41)           | 0.95(0.68-1.34)           | 0.93(0.66-1.31)           | 0.82(0.58-1.17)           |
| 6+, n=74                               | 18.9%                   | 2.25(1.29-3.92)           | 2.06(1.17-3.60)           | 1.85(1.03-3.32)           | 1.31(0.72-2.38)           |
| Leisure time physical activity         |                         |                           |                           |                           |                           |
| Low, n=409                             | 14.9%                   | 1 <sup>a</sup>            | 1 <sup>a</sup>            | 1 <sup>a</sup>            | 1 <sup>a</sup>            |
| Medium, n=1,978                        | 12.1%                   | <b>0.73(0.55-0.96)</b>    | 0.76(0.57-1.01)           | <b>0.73(0.55-0.97)</b>    | 0.78(0.59-1.04)           |
| High, n=240                            | 4.6%                    | <b>0.29(0.15-0.55)</b>    | <b>0.32(0.17-0.60)</b>    | <b>0.32(0.17-0.60)</b>    | <b>0.37(0.19-0.72)</b>    |
| BMI                                    |                         |                           |                           |                           |                           |
| < 25, n=1,220                          | 10.0%                   | 1 <sup>a</sup>            | 1 <sup>a</sup>            | 1 <sup>a</sup>            | 1 <sup>a</sup>            |
| > 25 – 28, n=957                       | 12.3%                   | 1.13(0.87-1.45)           | 1.12(0.87-1.45)           | 1.03(0.79-1.34)           | 1.02(0.78-1.32)           |
| > 28, n=454                            | 16.1%                   | <b>1.56(1.16-2.09)</b>    | <b>1.54(1.14-2.08)</b>    | 1.21(0.88-1.65)           | 1.19(0.86-1.65)           |
| Systolic BP, mm Hg                     |                         |                           |                           |                           |                           |
| < 120, n=757                           | 6.9%                    | 1 <sup>a</sup>            | 1 <sup>a</sup>            | 1 <sup>a</sup>            | 1 <sup>a</sup>            |
| > 120 – 150, n=1,523                   | 12.5%                   | <b>1.77(1.30-2.41)</b>    | <b>1.93(1.41-2.63)</b>    | <b>1.54(1.11-2.13)</b>    | <b>1.82(1.31-2.54)</b>    |
| > 150, n=355                           | 19.5%                   | <b>2.87(1.99-4.12)</b>    | <b>3.27(2.26-4.73)</b>    | <b>2.00(1.27-3.16)</b>    | <b>2.56(1.64-4.01)</b>    |
| Diastolic BP mm Hg                     |                         |                           |                           |                           |                           |
| < 75, n=768                            | 8.9%                    | 1 <sup>a</sup>            | 1 <sup>a</sup>            | 1 <sup>a</sup>            | 1 <sup>a</sup>            |
| >75-90, n=1,491                        | 11.7%                   | 1.26(0.95-1.67)           | <b>1.35(1.02-1.80)</b>    | 1.07(0.80-1.44)           | 1.01(0.75-1.37)           |
| > 90, n=376                            | 18.6%                   | <b>2.25(1.61-3.14)</b>    | <b>2.50(1.78-3.52)</b>    | 1.42(0.92-2.20)           | 1.39(0.91-2.12)           |
| Hypertension <sup>b</sup>              |                         |                           |                           |                           |                           |
| No, n=2,592                            | 11.6%                   | 1 <sup>a</sup>            | 1 <sup>a</sup>            | 1 <sup>a</sup>            | 1 <sup>a</sup>            |
| Yes, n=41                              | 26.8%                   | <b>2.95(1.61-5.40)</b>    | <b>2.90(1.58-5.32)</b>    | 1.74(0.92-3.32)           | 1.51(0.80-2.87)           |
| Physical fitness (VO <sub>2</sub> Max) |                         |                           |                           |                           |                           |
| 15-26, n=465                           | 16.4%                   | 1 <sup>a</sup>            | 1 <sup>a</sup>            | 1 <sup>a</sup>            | 1 <sup>a</sup>            |
| 27-38, n=1,616                         | 11.8%                   | 0.79(0.60-1.03)           | 0.78(0.60-1.03)           | 0.89(0.67-1.18)           | 0.92(0.69-1.22)           |
| 39-78, n=555                           | 8.3%                    | <b>0.56(0.39-0.82)</b>    | <b>0.59(0.41-0.86)</b>    | 0.73(0.49-1.09)           | 0.78(0.53-1.17)           |
| Psychological pressure at work         |                         |                           |                           |                           |                           |
| No, n=2,133                            | 12.6%                   | 1 <sup>a</sup>            | 1 <sup>a</sup>            | 1 <sup>a</sup>            | 1 <sup>a</sup>            |
| Yes, n=496                             | 8.5%                    | <b>0.65(0.47-0.90)</b>    | <b>0.70(0.48-0.93)</b>    | <b>0.64(0.46-0.89)</b>    | <b>0.68(0.48-0.96)</b>    |
| Psychological pressure at leisure      |                         |                           |                           |                           |                           |
| No, n=2,462                            | 11.9%                   | 1 <sup>a</sup>            | 1 <sup>a</sup>            | 1 <sup>a</sup>            | 1 <sup>a</sup>            |
| Yes, n=163                             | 11.7%                   | 1.12(0.71-1.79)           | 1.14(0.72-1.83)           | 1.17(0.73-1.87)           | 1.26(0.77-2.06)           |
| Work hours/week                        |                         |                           |                           |                           |                           |
| < 40, n=341                            | 7.9%                    | 1 <sup>a</sup>            | 1 <sup>a</sup>            | 1 <sup>a</sup>            | 1 <sup>a</sup>            |
| 40-45, n=1,865                         | 13.1%                   | <b>1.71(1.14-2.54)</b>    | <b>1.61(1.08-2.40)</b>    | <b>1.66(1.11-2.47)</b>    | 1.31(0.87-1.96)           |
| > 45, n=429                            | 9.8%                    | 1.26(0.78-2.04)           | 1.34(0.82-2.17)           | 1.25(0.77-2.06)           | 1.16(0.71-1.89)           |
| Social class                           |                         |                           |                           |                           |                           |
| High (I,II,III), n=1,075               | 9.2%                    | 1 <sup>a</sup>            | 1 <sup>a</sup>            | 1 <sup>a</sup>            | 1 <sup>a</sup>            |
| Low (IV,V), n=1,554                    | 13.7%                   | <b>1.64(1.29-2.08)</b>    | <b>1.53(1.20-1.95)</b>    | <b>1.62(1.27-2.07)</b>    | <b>1.35(1.05-1.75)</b>    |

<sup>a</sup>: reference category

<sup>b</sup>: receives doctor's treatment due to hypertension

<sup>c</sup>: adjusted for age; <sup>d</sup>: adjusted for age + lifestyle (smoking, LTPA, alcohol); <sup>e</sup>: adjusted for age + clinical factors (BMI, blood pressure including treatment for, physical fitness); <sup>f</sup>: age + all other confounders/risk factors (lifestyle, clinical factors, psychosocial stress at work and leisure, number of work hours, and social class  
na: not applicable



**Table 4. Men with high physical work demands only, n= 846. Lifestyle and other predictors of IHD mortality (n = 119, 14.1%) during the 30-year follow-up 1970/71 to 2001. Statistically significant results are highlighted (bold).**

|                                        | Cumulative incidence, % | Hazard Ratio <sup>c</sup> | Hazard Ratio <sup>d</sup> | Hazard Ratio <sup>e</sup> | Hazard Ratio <sup>f</sup> |
|----------------------------------------|-------------------------|---------------------------|---------------------------|---------------------------|---------------------------|
| Age                                    |                         |                           |                           |                           |                           |
| Youngest half (max 48 y), n=420        | 8.6%                    | na                        | 1 <sup>a</sup>            | 1 <sup>a</sup>            | 1 <sup>a</sup>            |
| Oldest half (> 48 y), n=426            | 19.5%                   |                           | <b>3.16(2.12-4.71)</b>    | <b>2.48(1.64-3.73)</b>    | <b>2.52(1.66-3.83)</b>    |
| Smoking                                |                         |                           |                           |                           |                           |
| Current, n=648                         | 15.3%                   | 1 <sup>a</sup>            | 1 <sup>a</sup>            | 1 <sup>a</sup>            | 1 <sup>a</sup>            |
| Previous, n=131                        | 9.2%                    | <b>0.46(0.25-0.84)</b>    | <b>0.45(0.24-0.82)</b>    | <b>0.40(0.22-0.73)</b>    | <b>0.38(0.20-0.71)</b>    |
| Never, n=67                            | 11.9%                   | 0.67(0.32-1.37)           | 0.71(0.34-1.46)           | 0.47(0.22-1.03)           | 0.49(0.22-1.09)           |
| Alcohol, beverages/d                   |                         |                           |                           |                           |                           |
| 0, n=218                               | 12.4%                   | 1 <sup>a</sup>            | 1 <sup>a</sup>            | 1 <sup>a</sup>            | 1 <sup>a</sup>            |
| 1-2, n=355                             | 15.2%                   | 1.23(0.78-1.96)           | 1.23(0.77-1.95)           | 1.31(0.81-2.11)           | 1.41(0.87-2.29)           |
| 3-5, n=208                             | 13.0%                   | 1.11(0.65-1.90)           | 1.00(0.58-1.72)           | 1.14(0.65-1.98)           | 0.95(0.53-1.67)           |
| 6+, n=60                               | 16.7%                   | <b>2.10(1.01-4.35)</b>    | 1.84(0.88-3.84)           | 2.05(0.97-4.33)           | 1.43(0.67-3.05)           |
| Leisure time physical activity         |                         |                           |                           |                           |                           |
| Low, n=144                             | 20.8%                   | 1 <sup>a</sup>            | 1 <sup>a</sup>            | 1 <sup>a</sup>            | 1 <sup>a</sup>            |
| Medium, n=586                          | 12.6%                   | <b>0.62(0.40-0.95)</b>    | <b>0.59(0.38-0.90)</b>    | <b>0.62(0.40-0.96)</b>    | <b>0.56(0.36-0.88)</b>    |
| High, n=114                            | 13.2%                   | 0.67(0.36-1.26)           | 0.64(0.34-1.21)           | 0.80(0.42-1.52)           | 0.77(0.40-1.48)           |
| BMI                                    |                         |                           |                           |                           |                           |
| < 25, n=351                            | 12.8%                   | 1 <sup>a</sup>            | 1 <sup>a</sup>            | 1 <sup>a</sup>            | 1 <sup>a</sup>            |
| > 25 – 28, n=299                       | 12.0%                   | 0.82(0.53-1.28)           | 0.87(0.56-1.36)           | 0.66(0.42-1.05)           | 0.73(0.45-1.17)           |
| > 28, n=194                            | 18.6%                   | 1.37(0.88-2.13)           | 1.34(0.84-2.12)           | 1.02(0.64-1.62)           | 1.08(0.66-1.76)           |
| Systolic BP, mm Hg                     |                         |                           |                           |                           |                           |
| < 120, n=238                           | 7.1%                    | 1 <sup>a</sup>            | 1 <sup>a</sup>            | 1 <sup>a</sup>            | 1 <sup>a</sup>            |
| > 120 – 150, n=499                     | 15.2%                   | <b>2.02(1.19-3.42)</b>    | <b>2.16(1.27-3.68)</b>    | 1.68(0.96-2.95)           | <b>1.93(1.07-3.46)</b>    |
| > 150, n=108                           | 24.1%                   | <b>3.20(1.72-5.95)</b>    | <b>3.41(1.81-6.44)</b>    | 2.13(0.97-4.66)           | 2.14(0.98-4.66)           |
| Diastolic BP mm Hg                     |                         |                           |                           |                           |                           |
| < 75, n=253                            | 11.5%                   | 1 <sup>a</sup>            | 1 <sup>a</sup>            | 1 <sup>a</sup>            | 1 <sup>a</sup>            |
| >75-90, n=455                          | 12.5%                   | 1.05(0.67-1.64)           | 1.05(0.67-1.66)           | 0.90(0.55-1.46)           | 0.79(0.47-1.30)           |
| > 90, n=137                            | 24.1%                   | <b>2.18(1.32-3.60)</b>    | <b>2.53(1.51-4.23)</b>    | 1.43(0.73-2.78)           | 1.60(0.83-3.09)           |
| Hypertension <sup>b</sup>              |                         |                           |                           |                           |                           |
| No, n=834                              | 13.8%                   | 1 <sup>a</sup>            | 1 <sup>a</sup>            | 1 <sup>a</sup>            | 1 <sup>a</sup>            |
| Yes, n=12                              | 33.3%                   | 2.32(0.85-6.30)           | 2.12(0.76-5.90)           | 1.80(0.64-5.13)           | 1.82(0.62-5.34)           |
| Physical fitness (VO <sub>2</sub> Max) |                         |                           |                           |                           |                           |
| 15-26, n=125                           | 23.2%                   | 1 <sup>a</sup>            | 1 <sup>a</sup>            | 1 <sup>a</sup>            | 1 <sup>a</sup>            |
| 27-38, n=531                           | 13.9%                   | <b>0.65(0.42-1.00)</b>    | <b>0.63(0.40-0.99)</b>    | 0.73(0.46-1.16)           | 0.70(0.43-1.13)           |
| 39-78, n=190                           | 8.4%                    | 0.41(0.22-0.76)           | 0.39(0.21-0.74)           | 0.54(0.27-1.06)           | <b>0.48(0.24-0.96)</b>    |
| Psychological pressure at work         |                         |                           |                           |                           |                           |
| No, n=708                              | 13.8%                   | 1 <sup>a</sup>            | 1 <sup>a</sup>            | 1 <sup>a</sup>            | 1 <sup>a</sup>            |
| Yes, n=136                             | 14.7%                   | 1.01(0.62-1.63)           | 1.08(0.66-1.76)           | 0.98(0.60-1.60)           | 1.04(0.61-1.78)           |
| Psychological pressure at leisure      |                         |                           |                           |                           |                           |
| No, n=795                              | 14.0%                   | 1 <sup>a</sup>            | 1 <sup>a</sup>            | 1 <sup>a</sup>            | 1 <sup>a</sup>            |
| Yes, n=47                              | 17.0%                   | 1.11(0.54-2.27)           | 1.15(0.56-2.37)           | 1.04(0.50-2.14)           | 1.09(0.51-2.30)           |
| Work hours/week                        |                         |                           |                           |                           |                           |
| < 40, n=51                             | 9.8%                    | 1 <sup>a</sup>            | 1 <sup>a</sup>            | 1 <sup>a</sup>            | 1 <sup>a</sup>            |
| 40-45, n=618                           | 14.6%                   | 1.50(0.61-3.70)           | 1.68(0.68-4.19)           | 1.47(0.60-3.63)           | 1.54(0.62-3.85)           |
| > 45, n=177                            | 13.6%                   | 1.49(0.57-3.89)           | 1.81(0.68-4.86)           | 1.38(0.52-3.64)           | 1.58(0.70-3.18)           |
| Social class                           |                         |                           |                           |                           |                           |
| High (I,II,III), n=74                  | 10.8%                   | 1 <sup>a</sup>            | 1 <sup>a</sup>            | 1 <sup>a</sup>            | 1 <sup>a</sup>            |
| Low (IV,V), n=771                      | 14.3%                   | 1.47(0.72-3.01)           | 1.43(0.69-2.96)           | 1.55(0.75-3.18)           | 1.49(0.70-3.18)           |

<sup>a</sup>: reference category

<sup>b</sup>: receives doctor's treatment due to hypertension

<sup>c</sup>: adjusted for age; <sup>d</sup>: adjusted for age + lifestyle (smoking, LTPA, alcohol); <sup>e</sup>: adjusted for age + clinical factors (BMI, blood pressure including treatment for, physical fitness); <sup>f</sup>: age + all other confounders/risk factors (lifestyle, clinical factors, psychosocial stress at work and leisure, number of work hours, and social class  
na: not applicable

1  
2  
3  
4  
5  
6  
7  
8  
9  
10  
11  
12  
13  
14  
15  
16  
17  
18  
19  
20  
21  
22  
23  
24  
25  
26  
27  
28  
29  
30  
31  
32  
33  
34  
35  
36  
37  
38  
39  
40  
41  
42  
43  
44  
45  
46  
47  
48  
49  
50  
51  
52  
53  
54  
55  
56  
57  
58  
59  
60

**CONTRIBUTORS** All authors contributed to the conception, design, interpretation of data, and writing or critically revising the manuscript. PS made the statistical analyses. AH and PS are guarantors.

**ACKNOWLEDGEMENT** The King Christian X's Foundation, The Danish Medical Research Council, The Danish Heart Foundation, and The Else & Mogens Wedell-Wedellsborg Foundation.

**CONFLICTS OF INTEREST** None

**COMPETING INTEREST STATEMENT** None. All authors declare that the answer to the questions on your competing interest form Exclusive licence (<http://bmj.com/cgi/content/full/317/7154/291/DC1>) are all No and therefore have nothing to declare.

**COPYRIGHT** "The Corresponding Author has the right to grant on behalf of all authors and does grant on behalf of all authors, an exclusive licence (or non exclusive for government employees) on a worldwide basis to the BMJ Publishing Group Ltd and its Licensees to permit this article (if accepted) to be published in HEART editions and any other BMJ PGL products to exploit all subsidiary rights"

**FUNDING** The study is a part of the Physical work demands and fitness project, financed by the Danish Working Environment Research Foundation.

**ETHICAL APPROVAL** When the Copenhagen Male Study (CMS) was initiated as a closed cohort study in 1970-71 no ethics committee for medical research had been established in Denmark. However, in 1985-86, when survivors from the first baseline were re-examined, the study was approved by the ethics committee for medical research in the county of Copenhagen, and all participants in the study gave informed consent to participate, as stated in many previous publications from the CMS based on analyses using the 1985-86 baseline.

**ORIGINELE STUDY PROTOCOL** It does not exist

**DATA SHARING STATEMENT** Technical appendix and statistical code available from the corresponding author at [aho@nrcwe.dk](mailto:aho@nrcwe.dk). Consent was not obtained, but the presented data are anonymised and risk of identification is very low. No additional data available.



## References

- 1 World Health Organization (WHO). Global burden of disease: 2004 Update. Geneva: WHO 2008:153.
- 2 Nurminen M, Karjalainen A. Epidemiologic estimate of the proportion of fatalities related to occupational factors in Finland. *Scandinavian Journal of Work Environment & Health* 2001;**27**:295.
- 3 Holtermann A, Mortensen OS, Burr H, *et al.* The interplay between physical activity at work and during leisure time - risk of ischemic heart disease and all-cause mortality in middle-aged Caucasian men. *Scandinavian Journal of Work & Environmental Health* 2009;**35**:466-74.
- 4 Holtermann A, Mortensen OS, Burr H, *et al.* Physical demands at work, physical fitness, and 30-year ischaemic heart disease and all-cause mortality in The Copenhagen Male Study. *Scandinavian Journal of Work & Environmental Health* 2010;**36**:357-65.
- 5 Krause N, Brand RJ, Kaplan GA, *et al.* Occupational physical activity, energy expenditure and 11-year progression of carotid atherosclerosis. *Scandinavian Journal of Work and Environmental Health* 2007;**33**:405-24.
- 6 Glagov S, Zarins C, Giddens DP, *et al.* Hemodynamics and atherosclerosis - Insights and perspectives gained from studies of human arteries. *Archives of Pathology & Laboratory Medicine* 1988;**112**:1018-31.
- 7 Blair SN, Kampert JB, Kohl HW, *et al.* Influences of cardiorespiratory fitness and other precursors on cardiovascular disease and all-cause mortality in men and women. *Journal of the American Medical Association* 1996;**276**:205-10.
- 8 Eicher JD, Maresh CM, Tsongalis GJ, *et al.* The additive blood pressure lowering effects of exercise intensity on post-exercise hypotension. *American Heart Journal* 2010;**160**:513-20.
- 9 Gyntelberg F. Physical fitness and coronary heart-disease male residents in copenhagen aged 40-59. *Danish Medical Bulletin* 1973;**20**:1-4.
- 10 Gyntelberg F. One-year and 2-years incidence of myocardial-infarction in copenhagen males aged 40-59. *Danish Medical Bulletin* 1975;**22**:81-4.
- 11 Hein HO, Suadicani P, Gyntelberg F. Ischaemic heart disease incidence by social class and form of smoking: the Copenhagen Male Study--17 years' follow-up. *J Intern Med* 1992;**231**:477-83.
- 12 Åstrand P-O, Rodahl K. *Textbook of work physiology. Physiological bases of exercise.* New York: McGraw-Hill Book Company 1986.
- 13 Svalastoga K. *Prestige, class and mobility.* Copenhagen: Munksgaard 1959.

- 1  
2  
3  
4  
5  
6  
7  
8  
9  
10  
11  
12  
13  
14  
15  
16  
17  
18  
19  
20  
21  
22  
23  
24  
25  
26  
27  
28  
29  
30  
31  
32  
33  
34  
35  
36  
37  
38  
39  
40  
41  
42  
43  
44  
45  
46  
47  
48  
49  
50  
51  
52  
53  
54  
55  
56  
57  
58  
59  
60
- 14 Hansen EJ. *Social groups in Denmark*. Copenhagen: The Danish National Centre for Social Research 1984.
  - 15 Ronksley PE, Brien SE, Turner BJ, *et al*. Association of alcohol consumption with selected cardiovascular disease outcomes: a systematic review and meta-analysis. *BMJ* 2011;**342**.
  - 16 Holtermann A, Hansen JV, Burr H, *et al*. The health paradox of occupational and leisure-time physical activity. *Br J Sports Med* 2011. Epub ahead of print
  - 17 Russo A, Onder G, Cesari M, *et al*. Lifetime occupation and physical function: a prospective cohort study on persons aged 80 years and older living in a community. *Occup Environ Med* 2006;**63**:438-42.
  - 18 Blair SN, Kohl HW, Paffenbarger RS, *et al*. Physical-fitness and all-cause mortality - a prospective-study of healthy-men and women. *JAMA* 1989;**262**:2395-401.
  - 19 Erikssen G, Liestøl K, Bjørnholt J, *et al*. Changes in physical fitness and changes in mortality. *The Lancet* 1998;**352**:759-62.
  - 20 Hein HO, Suadicani P, Gyntelberg F. Physical-fitness or physical-activity as a predictor of ischemic-heart-disease - A 17-year follow-up in the Copenhagen Male Study. *Journal of Internal Medicine* 1992;**232**:471-9.
  - 21 Sallis JF, Saelens BE. Assessment of physical activity by self-report: Status, limitations, and future directions. *Research Quarterly For Exercise And Sport* 2000;**71**:S1-S14.
